# Supplementary material for: A novel immune-related gene signature predicts the prognosis of hepatocellular carcinoma
Source: Front Oncol. 2022 Sep 15;12:955192. doi: 10.3389/fonc.2022.955192 (PMC9520462; doi:10.3389/fonc.2022.955192)
Supplement: Supplementary file 1 [file Table_1.xls]

## Sheet: differentially expressed genes
differentially expressed genes between 160 non-turmor and 374 HCCsamples
gene	Non-tumor.Mean	Tumor.Mean	logFC	pValue	fdr
AF111169.1	1.11687	0	-1.11687	2.88097e-70	7.87141e-68
MOGAT2	4.76664	2.13506	-2.63158	6.75804e-46	7.90665e-45
MFSD3	3.60089	4.64797	1.04708	1.08936e-33	5.57864e-33
AL671277.1	1.03493	2.40577	1.37084	1.05719e-20	2.69506e-20
ST3GAL6	3.55295	2.11447	-1.43848	5.72362e-52	1.14098e-50
ESM1	0.185306	1.99202	1.80671	6.29206e-68	1.03452e-65
MT1L	5.04359	2.59059	-2.453	2.86887e-42	2.58741e-41
MYOM2	1.62718	0.281968	-1.34521	4.39627e-67	6.28294e-65
MAF1	4.1233	5.3744	1.25111	2.62294e-59	1.09019e-57
NPHP3	1.65287	0.58912	-1.06375	1.06341e-30	4.58195e-30
MT1A	5.57687	3.39375	-2.18312	1.76715e-27	6.36029e-27
HLA-DRB1	4.6342	6.89238	2.25818	3.81027e-30	1.58775e-29
RBM15B	1.98786	3.01271	1.02485	7.30835e-56	2.10531e-54
NCAPG	0.23714	1.46072	1.22358	2.70252e-62	1.67367e-60
MIR4292	0.205258	1.39141	1.18616	2.22777e-51	4.21485e-50
SNORD99	0.268894	1.44749	1.1786	1.3926e-45	1.59416e-44
MASP2	6.46491	4.81754	-1.64737	5.14221e-37	3.20487e-36
CAMK1	3.12262	2.02394	-1.09868	2.66746e-43	2.59878e-42
DEFA1	1.55455	0	-1.55455	9.60504e-69	1.82094e-66
GRAMD1C	2.1955	1.06959	-1.12592	9.66147e-45	1.04058e-43
FCGR2B	2.10768	0.565589	-1.54209	2.72867e-57	9.03673e-56
PHYKPL	4.46399	2.41535	-2.04865	2.97168e-59	1.22419e-57
PHLDA2	1.3603	2.56308	1.20277	7.82507e-21	2.00638e-20
AC138430.2	1.36286	0	-1.36286	9.60504e-69	1.82094e-66
ATP6AP2	4.21908	5.35592	1.13684	1.96113e-48	2.83548e-47
ACOX2	5.83513	4.42596	-1.40917	1.25006e-31	5.67983e-31
CYP2E1	9.73434	5.73165	-4.00268	5.97546e-42	5.27402e-41
STARD5	3.13051	0.806475	-2.32404	3.67529e-65	3.59385e-63
FLYWCH2	2.16113	3.31673	1.1556	8.50686e-43	7.97019e-42
RPL41	8.68001	7.12214	-1.55787	3.44064e-24	1.04025e-23
OGDHL	4.70488	3.42597	-1.27891	1.41866e-20	3.60022e-20
FARS2	2.11606	3.1244	1.00835	2.92944e-39	2.12769e-38
IGLC3	4.67833	3.32751	-1.35082	8.85441e-13	1.59987e-12
RNF5	5.11009	6.24132	1.13123	3.09306e-42	2.78151e-41
NPIPB14P	2.21938	0.166151	-2.05323	6.01534e-29	2.33854e-28
PEMT	6.08201	4.76658	-1.31544	4.10249e-38	2.76461e-37
RMI2	0.560125	1.67962	1.11949	1.3318e-48	1.96689e-47
CAPN3	2.47232	0.296069	-2.17625	3.64161e-36	2.14106e-35
AGXT2	4.4516	2.91014	-1.54146	2.75569e-34	1.46113e-33
EIF3I	5.28532	6.53093	1.24562	2.4086e-49	3.7891e-48
HMGB2	2.96224	4.02217	1.05993	7.54487e-37	4.64929e-36
LSM2	3.39366	4.74655	1.35289	6.12061e-62	3.62149e-60
PON1	7.04365	5.92885	-1.11479	3.72101e-09	5.76731e-09
PRG4	5.04021	3.91455	-1.12567	1.1457e-07	1.667e-07
MZT1	1.16432	2.26041	1.09609	7.43736e-60	3.31364e-58
S100A12	1.88046	0.308737	-1.57173	4.17378e-60	1.91942e-58
CFHR2	5.70795	2.9628	-2.74515	1.17803e-44	1.26002e-43
LYZ	3.06406	5.92833	2.86427	1.71127e-35	9.70523e-35
CCDC167	3.94832	5.32159	1.37327	6.00058e-54	1.44037e-52
MBL1P	1.53408	0.312115	-1.22197	2.68699e-50	4.6181e-49
NBPF9	2.28784	0.85934	-1.4285	1.38063e-39	1.02932e-38
HAUS7	2.05124	0.670848	-1.3804	3.27082e-29	1.28966e-28
FP236383.3	5.78795	0.0218248	-5.76613	4.3115e-62	2.61776e-60
ZNF622	3.05252	4.39236	1.33984	4.79402e-47	6.12572e-46
NPIPB3	3.00963	0.117865	-2.89177	6.00416e-32	2.77698e-31
ADGRA3	3.84256	2.46119	-1.38137	1.691e-40	1.33236e-39
RPS10-NUDT3	1.21814	0.0226535	-1.19549	1.43911e-41	1.23043e-40
TYK2	4.77866	3.45625	-1.32241	5.13529e-21	1.32826e-20
PSMB5	4.95139	6.00582	1.05443	3.41412e-65	3.35613e-63
BDH1	5.50671	3.93776	-1.56895	7.4687e-38	4.94339e-37
MICOS10	3.97539	2.19662	-1.77877	1.508e-35	8.58893e-35
SORBS2	3.74238	2.52437	-1.21801	3.1971e-44	3.32209e-43
CFB	8.82294	6.0319	-2.79104	1.62467e-50	2.83691e-49
AC004057.1	4.98155	0.130039	-4.85151	1.86037e-34	9.96649e-34
AC011558.1	2.15539	0	-2.15539	2.88094e-70	7.87141e-68
STAT1	3.69956	4.94928	1.24971	1.16214e-30	4.9842e-30
METTL22	2.15285	1.05066	-1.10219	3.66485e-40	2.84416e-39
ACAD8	3.1893	2.17793	-1.01137	5.9724e-54	1.43546e-52
NEK2	0.219034	1.71363	1.4946	1.1779e-64	1.06752e-62
NOMO3	1.67359	0.378589	-1.29501	1.06344e-35	6.11124e-35
CTHRC1	0.365583	1.75762	1.39204	9.1181e-49	1.36287e-47
ALDH3A1	0.618893	2.2365	1.61761	3.16423e-07	4.5187e-07
CRIP1	1.63577	0.383597	-1.25217	8.87351e-43	8.2928e-42
CASP4	3.75444	2.57399	-1.18045	3.11899e-35	1.74752e-34
PHGDH	4.69052	3.27257	-1.41795	5.8917e-27	2.06811e-26
PTS	4.20479	2.71077	-1.49401	1.22662e-58	4.7281e-57
FNBP4	3.27631	2.25788	-1.01843	3.40612e-23	9.77183e-23
SHISA4	1.83268	2.91855	1.08587	4.63529e-28	1.71313e-27
PBK	0.279671	1.72666	1.44699	1.1029e-61	6.26628e-60
NUTM2A-AS1	2.05018	0.980418	-1.06976	1.46366e-32	7.03579e-32
ZNF23	1.27505	0.126387	-1.14867	2.14858e-32	1.02224e-31
CYP8B1	6.44657	4.56138	-1.88519	2.05539e-10	3.3642e-10
ECM1	3.59351	1.56738	-2.02613	5.56706e-59	2.22431e-57
LCAT	6.23604	3.62228	-2.61376	2.13655e-58	7.97086e-57
GASK1A	1.95333	0.664282	-1.28905	5.27387e-45	5.78072e-44
SPNS1	2.37074	0.714821	-1.65592	6.07383e-26	2.01295e-25
HLA-DRB6	1.483	3.10994	1.62694	1.55741e-23	4.5517e-23
MMP11	0.395616	1.73435	1.33874	2.15391e-51	4.08341e-50
APEX2	2.15908	3.25716	1.09809	7.288e-53	1.57629e-51
RNA5SP216	1.82861	0	-1.82861	2.04954e-53	4.6722e-52
ZBTB33	1.89027	2.96356	1.07329	2.10342e-39	1.54342e-38
SRXN1	2.28916	1.17206	-1.11711	3.25417e-19	7.76911e-19
RBM4	3.41827	1.24616	-2.17211	7.87681e-26	2.59704e-25
VIPR1	2.89489	0.449917	-2.44498	2.82846e-65	2.87158e-63
SPTSSA	3.32653	4.72047	1.39394	3.36407e-42	3.01804e-41
SLBP	3.11531	4.17055	1.05523	1.22825e-60	6.14637e-59
NMRAL2P	0.100034	1.28432	1.18429	6.94533e-40	5.28841e-39
AC244090.1	1.97649	3.15857	1.18208	1.65554e-41	1.40899e-40
SLC25A5	6.49665	7.70501	1.20837	4.73054e-49	7.24557e-48
LINC01001	1.87806	0.0792737	-1.79878	1.29813e-38	9.02618e-38
ARNTL	2.46783	1.43648	-1.03135	8.62923e-33	4.19912e-32
SRRM2	6.41612	4.4114	-2.00471	6.47838e-29	2.51277e-28
PC	6.45126	5.0446	-1.40666	1.27873e-44	1.36616e-43
TRNP1	1.3432	2.6289	1.2857	1.39855e-16	2.97195e-16
AC104794.4	1.94799	0.173458	-1.77453	7.7419e-57	2.43379e-55
NDUFA9	3.87393	2.37257	-1.50136	1.89342e-39	1.39373e-38
RRP9	2.48677	3.7798	1.29303	9.24304e-59	3.61529e-57
CBX1	2.36087	3.51544	1.15457	4.26206e-64	3.55089e-62
RRAGD	1.66351	2.72379	1.06028	1.1484e-35	6.57914e-35
S100A6	4.4364	5.61614	1.17974	6.38004e-15	1.26505e-14
AC004967.1	0.950698	2.33871	1.38801	2.83728e-46	3.42297e-45
HGS	4.0238	2.99307	-1.03073	2.31978e-15	4.68572e-15
LINC02027	2.33069	0.971393	-1.3593	2.36261e-30	9.94898e-30
PPFIBP2	3.42573	2.17988	-1.24585	5.86016e-54	1.41031e-52
SDR39U1	3.68638	1.67628	-2.0101	1.21859e-32	5.88375e-32
DLGAP5	0.167111	1.29949	1.13238	1.14054e-64	1.03873e-62
IFITM2	7.7858	6.66861	-1.11719	7.58454e-25	2.37588e-24
PDIA4	6.00836	7.13082	1.12246	5.66979e-35	3.12857e-34
IGKV1-33	1.36597	0.127106	-1.23886	6.32555e-48	8.77032e-47
EGFL8	1.6505	0.419819	-1.23068	3.74794e-21	9.74432e-21
DDT	7.0486	5.91373	-1.13487	5.20907e-33	2.56369e-32
AC011462.2	2.44773	0.00481569	-2.44291	1.985e-39	1.45941e-38
SMG6	1.83517	0.824427	-1.01074	1.29213e-47	1.73583e-46
CBWD3	2.05424	0.0429752	-2.01127	2.80276e-47	3.64654e-46
RELB	2.10947	3.11901	1.00954	5.39848e-28	1.98768e-27
RACGAP1	0.686185	2.06559	1.37941	5.87724e-66	6.78219e-64
DNLZ	1.38623	0.073041	-1.31318	1.21321e-38	8.46426e-38
ITIH2	7.21535	9.05309	1.83775	6.41657e-32	2.96477e-31
PLIN4	3.79516	2.61436	-1.1808	4.11647e-28	1.52624e-27
PFDN2	4.96699	6.42079	1.4538	1.73694e-57	5.84612e-56
BSCL2	3.1084	1.09554	-2.01286	5.26529e-37	3.28048e-36
PCBP1-AS1	2.96214	0.686756	-2.27538	1.20312e-45	1.38321e-44
REC8	2.19868	0.924597	-1.27409	1.16268e-41	1.00332e-40
HLA-H	2.78366	4.91334	2.12968	8.98171e-41	7.21449e-40
PCOLCE	4.61068	3.49463	-1.11605	9.49894e-18	2.13064e-17
PCK1	7.73457	5.35704	-2.37753	1.29165e-28	4.92358e-28
AC006205.2	0.807822	1.88651	1.07869	1.42082e-08	2.1498e-08
NDRG3	1.70887	3.0979	1.38903	4.71004e-66	5.64567e-64
SNX15	1.25242	0.170725	-1.08169	2.80076e-19	6.70299e-19
PEX11B	3.07245	4.3161	1.24365	6.40174e-50	1.06767e-48
ABCB4	4.9726	3.54895	-1.42365	4.87344e-24	1.46274e-23
ASF1A	1.77629	2.82376	1.04748	3.5973e-42	3.21937e-41
CD248	1.14483	2.4264	1.28157	2.82483e-46	3.41017e-45
AC113935.1	3.05968	4.54718	1.4875	1.81543e-42	1.65907e-41
FAM83H	2.35389	4.11471	1.76082	1.07726e-60	5.45352e-59
SLC35F6	2.81904	4.30537	1.48633	1.26604e-56	3.94e-55
EHMT1	2.83202	1.71993	-1.11209	9.05599e-42	7.8512e-41
AC112206.2	2.67734	0.828441	-1.8489	3.8533e-45	4.26896e-44
RPL23AP42	5.1259	2.01482	-3.11108	6.15277e-29	2.39047e-28
FBP1	7.49676	6.44363	-1.05312	2.52718e-10	4.11828e-10
TNFRSF14	4.47065	3.33286	-1.13779	1.14577e-30	4.91962e-30
WASH9P	2.27646	1.00992	-1.26654	7.21105e-19	1.69609e-18
AGAP4	1.7151	0.366422	-1.34867	3.32053e-22	9.08038e-22
EP400P1	2.02177	0.851409	-1.17036	1.23509e-38	8.60072e-38
FAM156A	1.62367	0.0172437	-1.60643	5.82341e-37	3.61971e-36
N4BP2L1	4.00885	2.26179	-1.74706	1.66943e-61	9.28632e-60
PRSS53	1.70579	0.304023	-1.40177	4.99502e-43	4.77134e-42
H19	6.85729	4.31653	-2.54076	5.21199e-26	1.73288e-25
ADH4	7.72755	6.18662	-1.54093	3.3224e-09	5.16543e-09
RNA5SP334	2.07312	0.199358	-1.87376	3.80523e-17	8.30658e-17
ISY1-RAB43	1.07718	0.00580512	-1.07137	4.90658e-39	3.51559e-38
FAM163B	1.63899	0.452742	-1.18625	8.20214e-48	1.12132e-46
GPAA1	4.74576	6.08259	1.33683	4.19075e-63	2.93811e-61
HSPA5	6.25952	7.95285	1.69332	7.56366e-52	1.49336e-50
POLR2K	3.67197	4.93834	1.26637	1.34953e-65	1.44032e-63
MLPH	3.63319	2.07892	-1.55427	2.68406e-34	1.42437e-33
ACSM1	1.20785	2.83626	1.62841	3.97495e-17	8.66994e-17
PLAC8	1.92585	0.481729	-1.44412	3.15138e-60	1.4748e-58
NCOR1	3.54167	2.15761	-1.38406	1.28728e-65	1.39048e-63
SKP1	5.3937	3.94647	-1.44724	7.49456e-24	2.2294e-23
CXCL9	1.18725	2.73051	1.54326	4.52718e-30	1.87663e-29
IGLC2	5.38346	3.98008	-1.40339	3.42777e-12	6.03358e-12
AKR1B10	2.31149	6.22756	3.91607	8.49837e-31	3.6856e-30
LEAP2	6.38518	4.86637	-1.51881	1.3581e-31	6.1602e-31
NFKBIE	2.0488	3.10659	1.0578	2.77654e-34	1.47134e-33
TSPAN8	2.45339	4.26892	1.81553	4.82891e-23	1.37665e-22
DEFA1B	1.54167	0	-1.54167	3.12052e-67	4.56505e-65
AL162151.2	2.63552	1.38263	-1.25289	0.00349742	0.00413455
SULT1A4	1.06499	0.00318511	-1.0618	1.84379e-47	2.44161e-46
EIF4A1	4.75722	0.655659	-4.10156	3.92731e-38	2.6504e-37
OR2I1P	1.64784	5.17874	3.53089	1.46792e-49	2.34905e-48
PLSCR4	3.34024	2.22568	-1.11456	1.23509e-38	8.60072e-38
SATB1	1.92546	0.796815	-1.12865	2.38945e-60	1.13539e-58
AC083798.2	1.96448	0.322304	-1.64218	1.2101e-37	7.88307e-37
POLR2J3	2.7644	0.278484	-2.48592	6.48682e-27	2.27008e-26
DEFA3	1.1609	0.0507388	-1.11016	2.52625e-55	6.80221e-54
NAGK	3.31606	2.2064	-1.10966	2.92946e-39	2.12769e-38
HERC2P3	1.66416	0.252495	-1.41167	6.9384e-33	3.39233e-32
AC023157.1	0.694547	1.98318	1.28863	3.38271e-20	8.43362e-20
SF3B5	5.69698	6.74766	1.05068	6.90518e-46	8.06864e-45
ERVK3-1	2.7688	1.59926	-1.16953	2.44186e-17	5.37909e-17
FAM83D	0.878233	2.43301	1.55478	1.53854e-56	4.72472e-55
NAAA	3.24979	2.23481	-1.01498	2.34626e-37	1.49952e-36
ADSSL1	3.51977	1.73926	-1.78051	6.32635e-42	5.55732e-41
TMEM14A	4.05266	5.59138	1.53872	3.66401e-45	4.0641e-44
RBP7	1.5762	3.48861	1.91241	3.57521e-49	5.53993e-48
CYC1	5.64982	6.68786	1.03804	3.14901e-53	6.98991e-52
RPL37	7.29931	6.17803	-1.12128	8.80912e-20	2.1566e-19
ENO3	4.94961	2.26023	-2.68938	1.63281e-53	3.76846e-52
AFG3L1P	2.082	0.721128	-1.36087	3.32358e-23	9.54976e-23
RHOU	3.10991	4.25004	1.14013	4.58965e-29	1.79594e-28
CYP2A6	7.8848	5.54271	-2.3421	2.06076e-12	3.66066e-12
FYN	3.13359	1.85286	-1.28074	4.30149e-54	1.04467e-52
ADRA2C	0.266162	1.30558	1.03942	3.97497e-30	1.65474e-29
ZNF638	4.13678	2.71486	-1.42192	8.43618e-42	7.33817e-41
AL035252.4	1.24697	0.126018	-1.12095	2.73007e-12	4.8247e-12
STK39	0.606036	1.68866	1.08262	2.51776e-34	1.33803e-33
TOP2A	0.53058	2.64874	2.11816	5.85754e-63	4.03064e-61
SAA4	8.41687	6.00767	-2.4092	5.1355e-45	5.6357e-44
RPPH1	1.23546	0	-1.23546	4.941e-71	1.63928e-68
FGL1	9.261	7.77118	-1.48981	2.08359e-17	4.60353e-17
SKA1	0.114932	1.33493	1.22	1.45048e-67	2.22714e-65
CYP39A1	3.44198	1.8386	-1.60338	5.56852e-27	1.95868e-26
SLC25A27	2.6778	0.999196	-1.6786	6.73824e-38	4.47107e-37
NCAPH	0.269676	1.38243	1.11275	1.57254e-63	1.1925e-61
SORL1	3.41442	2.29674	-1.11768	4.19049e-33	2.07061e-32
AKAP9	3.18559	1.8715	-1.31409	1.2789e-48	1.89178e-47
PAGE4	0.0445223	1.16187	1.11734	1.07351e-22	3.00689e-22
NR2C1	3.03728	1.77162	-1.26566	6.22273e-28	2.28663e-27
GDF2	2.30073	0.229345	-2.07139	6.95312e-69	1.38905e-66
ALYREF	3.37104	4.72319	1.35215	2.03942e-53	4.66057e-52
ACSM2A	6.3374	4.00177	-2.33564	2.35539e-42	2.14408e-41
PMS2P6	1.52176	0.169596	-1.35217	1.41859e-42	1.30605e-41
ERP44	3.22175	4.27941	1.05766	9.29039e-31	4.0197e-30
SULT1A3	2.5913	0.0213889	-2.56991	1.73942e-28	6.58047e-28
MICAL3	2.13774	0.877126	-1.26061	1.92247e-41	1.62648e-40
ERCC5	3.47494	2.19837	-1.27657	1.98293e-42	1.81125e-41
AC008655.1	1.68205	0	-1.68205	9.88114e-66	1.08628e-63
CENPB	3.70808	5.01901	1.31093	7.83472e-61	4.03217e-59
ZBTB48	3.4941	2.349	-1.1451	5.6229e-34	2.93367e-33
NFKBIL1	2.87886	4.02581	1.14695	2.73003e-59	1.13217e-57
STC1	0.728148	1.89363	1.16548	2.83645e-39	2.06256e-38
MIR3682	0.918547	2.7443	1.82575	2.542e-32	1.20234e-31
DSN1	1.61269	2.87532	1.26263	6.91977e-66	7.74472e-64
EGLN2	3.37264	2.20065	-1.17199	1.43794e-23	4.21114e-23
MATR3	1.8152	0.199833	-1.61536	1.91622e-25	6.20125e-25
PDXP	3.18082	1.0746	-2.10622	4.19327e-46	5.01653e-45
EFHD1	3.30786	2.23172	-1.07614	8.33429e-17	1.79092e-16
CENPA	0.179928	1.25583	1.0759	3.33309e-60	1.55592e-58
LINC01093	4.28228	1.41571	-2.86658	1.19298e-48	1.77315e-47
DAD1	5.89936	7.34845	1.44909	4.62996e-67	6.51667e-65
ZACN	1.67174	0.145526	-1.52621	2.69808e-33	1.35005e-32
RPIA	1.73439	2.74642	1.01204	1.19703e-59	5.18407e-58
AL513327.1	1.59818	0.290015	-1.30816	1.26282e-39	9.43385e-39
TNK2	3.07239	1.95021	-1.12218	1.60269e-28	6.07558e-28
EIF3F	4.76001	3.68265	-1.07735	4.72199e-30	1.9552e-29
GRN	5.17587	6.67584	1.49997	6.3666e-61	3.30405e-59
MMP23B	1.10872	0.0508291	-1.05789	7.06901e-44	7.14166e-43
TGM3	0.268235	2.06128	1.79304	1.04159e-42	9.68552e-42
ZNF160	1.91719	0.908504	-1.00868	5.59767e-49	8.51057e-48
TNKS1BP1	5.05572	4.04499	-1.01072	1.81285e-44	1.9126e-43
TBCAP1	0.861534	2.3982	1.53667	3.70627e-34	1.94957e-33
MYL12B	6.50135	7.59769	1.09634	7.13726e-50	1.1766e-48
USP34	2.72267	1.13452	-1.58815	4.02493e-43	3.86455e-42
GDA	3.39566	2.37165	-1.024	3.49712e-20	8.70721e-20
HSD17B7	3.53687	2.50888	-1.02799	3.71758e-19	8.84933e-19
GABARAP	6.33893	4.36925	-1.96968	9.58127e-51	1.69372e-49
HLA-DPB1	3.79761	5.1412	1.34359	5.71907e-21	1.47617e-20
TRA2B	3.85779	2.81512	-1.04267	3.64271e-42	3.25845e-41
SLC29A1	3.96485	5.03143	1.06658	2.43695e-27	8.71366e-27
FAM3B	0.615401	1.64018	1.02478	0.016631	0.0188988
CPD	2.58003	3.85243	1.2724	7.97085e-41	6.41917e-40
GGT5	3.627	1.98393	-1.64308	4.92962e-44	5.03228e-43
RPL13	8.50204	6.78932	-1.71273	1.7023e-27	6.13047e-27
BPNT1	2.43685	3.61237	1.17551	2.7986e-49	4.38779e-48
TTLL3	2.0283	0.655106	-1.37319	1.44508e-19	3.50042e-19
NUDT1	1.32907	2.44758	1.11851	3.06209e-53	6.81324e-52
MAGEA1	0.00653169	1.48518	1.47865	1.76165e-38	1.21356e-37
CDC6	0.526465	1.70497	1.17851	7.75551e-50	1.27175e-48
WDR19	2.66654	1.40046	-1.26608	1.88208e-37	1.21161e-36
SIK1	1.82102	0.599881	-1.22114	3.1728e-26	1.06808e-25
CYP1A2	4.83112	2.04369	-2.78743	2.30688e-27	8.26446e-27
RPS15A	7.35082	5.46882	-1.882	1.74647e-30	7.40645e-30
GADD45GIP1	3.88902	4.92433	1.03531	2.17539e-43	2.12831e-42
AC022149.1	1.60453	0.574253	-1.03028	1.00405e-15	2.0601e-15
VWF	1.28338	2.88775	1.60437	5.01481e-44	5.11362e-43
TPP1	4.59071	5.70367	1.11296	1.09413e-40	8.74315e-40
CXCL14	3.47893	0.767535	-2.71139	2.19179e-57	7.33715e-56
NME2	5.65661	4.25818	-1.39843	2.45499e-18	5.64316e-18
MUC20-OT1	3.4721	0.905579	-2.56653	8.01002e-23	2.25621e-22
CENPF	0.321748	1.47912	1.15737	2.56411e-56	7.65894e-55
ST14	1.81118	3.18878	1.3776	9.32444e-23	2.61888e-22
AL160408.2	2.8776	0	-2.8776	4.941e-71	1.63928e-68
GAPDHP1	0.926167	2.57441	1.64825	9.09966e-37	5.56859e-36
CHRDL2	2.59468	1.49889	-1.09579	8.0171e-17	1.72475e-16
AC055720.2	1.10045	3.16056	2.06011	3.91387e-31	1.72476e-30
NDEL1	3.39875	1.87796	-1.52078	6.53418e-65	6.19381e-63
DCTPP1	2.85273	3.95354	1.10081	1.52805e-53	3.53105e-52
PAFAH1B3	1.71099	3.35979	1.64881	6.79329e-48	9.37686e-47
GTF2IP1	2.62092	0.173955	-2.44696	1.15635e-33	5.91029e-33
CAPN12	3.15724	1.57314	-1.58409	3.71157e-16	7.74888e-16
RABIF	1.49088	2.95368	1.4628	4.0378e-67	5.81536e-65
EPHX2	5.72877	4.38173	-1.34704	5.35536e-34	2.7988e-33
ZMAT2	4.12939	5.40647	1.27708	5.15645e-56	1.50869e-54
IL1RN	5.05107	3.60744	-1.44364	1.35102e-19	3.27556e-19
SYT7	4.05434	2.99084	-1.0635	4.87796e-13	8.91128e-13
ZSCAN16-AS1	1.84575	2.93461	1.08886	7.20481e-35	3.95445e-34
VAT1	3.73606	5.35609	1.62003	4.51114e-52	9.09028e-51
CSF3R	2.30075	0.65076	-1.64999	2.2207e-57	7.42056e-56
AKR7A3	5.40344	4.39516	-1.00828	3.76182e-07	5.35237e-07
TUBG1	2.8801	3.99504	1.11494	2.5511e-50	4.38859e-49
POLR2F	3.44783	0.0148129	-3.43302	1.37494e-36	8.30928e-36
HEBP2	3.80835	2.72352	-1.08483	2.63441e-45	2.9556e-44
MRPL38	3.77756	1.66401	-2.11355	5.2364e-28	1.92992e-27
BTF3L4P2	2.32844	1.22557	-1.10287	9.309e-47	1.16702e-45
TMEM115	3.43792	4.69545	1.25753	1.57168e-58	5.935e-57
AC007969.1	1.73177	3.04885	1.31709	8.01508e-32	3.68321e-31
RASSF3	1.60991	2.87328	1.26337	5.33965e-39	3.82e-38
ERRFI1	6.67994	5.67259	-1.00735	5.45952e-19	1.28934e-18
MFSD5	2.4041	3.49923	1.09513	8.52629e-62	4.95031e-60
TPX2	0.926968	2.9638	2.03684	6.02815e-59	2.39822e-57
HAMP	7.73072	1.93721	-5.79351	5.93829e-66	6.81034e-64
MKNK1	2.8416	1.77773	-1.06387	1.50933e-37	9.76725e-37
XRCC1	2.13006	3.14406	1.014	8.05232e-67	1.10818e-64
CXCL2	6.40668	3.88903	-2.51765	2.66895e-47	3.47736e-46
CYP2D7	5.00814	2.51356	-2.49458	6.76873e-39	4.79986e-38
ANGPTL6	3.17853	1.2115	-1.96703	1.83986e-66	2.30965e-64
ALDH1A1	6.93959	8.3453	1.40571	1.37808e-28	5.24443e-28
AC068631.1	2.24193	0.633654	-1.60827	1.21755e-39	9.11026e-39
DPYS	6.60509	5.28675	-1.31834	5.13298e-20	1.26842e-19
TOMM20	4.11121	5.95301	1.8418	1.40698e-64	1.25073e-62
PLIN1	2.73728	1.39492	-1.34236	4.56869e-32	2.12843e-31
NAMPT	5.60479	3.81671	-1.78808	7.28396e-37	4.49447e-36
SCAMP5	0.831495	1.95665	1.12516	5.11647e-36	2.9874e-35
TREX1	1.83546	0	-1.83546	4.94106e-71	1.63928e-68
AC120498.4	0.618643	2.16451	1.54587	2.94916e-48	4.19865e-47
RAP1B	3.58883	1.298	-2.29083	5.94222e-58	2.09887e-56
CSTF2	1.25133	2.39856	1.14723	9.54521e-63	6.31105e-61
AP003108.2	1.92444	0.0949081	-1.82953	5.74398e-31	2.51514e-30
UPK3A	0.0922343	1.45479	1.36255	1.59822e-29	6.40494e-29
UBD	2.38667	5.49396	3.10728	1.15055e-46	1.43271e-45
CLEC4G	3.8314	0.493657	-3.33774	3.18237e-65	3.16178e-63
PLA2G12B	3.9306	4.97051	1.03991	1.08984e-21	2.90725e-21
ATF3	4.35712	3.06566	-1.29147	1.7907e-20	4.52275e-20
CCNL1	4.78861	2.75251	-2.0361	4.54358e-50	7.6741e-49
KHK	6.8559	5.65373	-1.20217	3.94601e-31	1.73851e-30
ATG4B	3.96494	2.91583	-1.04911	4.32114e-22	1.17631e-21
NR1I2	4.26957	2.34683	-1.92274	1.40013e-40	1.11024e-39
LMBR1L	3.04041	1.99828	-1.04213	8.11597e-31	3.52552e-30
ABCD4	3.56346	2.30797	-1.25549	8.44832e-54	2.00206e-52
KRT13	1.27091	0.139798	-1.13112	9.23583e-37	5.64635e-36
PECAM1	1.86656	3.55666	1.6901	2.18024e-49	3.44152e-48
SAA2	9.20479	4.14561	-5.05918	4.24999e-38	2.86193e-37
PSAP	7.52909	8.75663	1.22754	5.49447e-50	9.22148e-49
TMEM150B	0.702655	2.43695	1.73429	2.00146e-44	2.1068e-43
LUC7L2	3.54336	2.39424	-1.14912	1.63835e-21	4.33053e-21
BYSL	2.21728	3.33242	1.11514	6.16561e-46	7.25465e-45
NR2C2AP	2.06501	3.37247	1.30746	1.77292e-66	2.24075e-64
SOWAHA	0.671336	2.11002	1.43869	2.81256e-46	3.39756e-45
NOP10	5.65646	6.80859	1.15213	1.59795e-55	4.44437e-54
SCCPDH	4.93912	6.31889	1.37977	4.67473e-39	3.35771e-38
SAA1	10.7074	7.16496	-3.54247	7.85299e-24	2.33368e-23
ALDH8A1	5.41278	4.34212	-1.07065	3.92114e-15	7.8427e-15
ACLY	2.93527	4.32505	1.38978	2.56405e-56	7.65894e-55
LINC02532	3.83835	2.21519	-1.62316	7.07868e-50	1.16798e-48
HSP90AB1	6.64948	8.55435	1.90486	1.59422e-65	1.66398e-63
CYP3A4	7.36657	4.88358	-2.48299	2.85163e-14	5.49553e-14
CBWD1	2.1157	0.59625	-1.51945	6.63911e-32	3.06531e-31
LINC00853	0.264348	1.48988	1.22553	3.15495e-57	1.03561e-55
CANX	5.86064	7.11318	1.25253	3.45171e-47	4.45962e-46
AL157392.3	2.19158	0.425058	-1.76652	7.98302e-22	2.1492e-21
ARHGEF10L	4.90495	3.76329	-1.14167	5.13613e-36	2.99793e-35
ITSN1	2.76331	1.39134	-1.37196	4.53028e-58	1.62801e-56
LAPTM4A	6.02152	7.12437	1.10284	7.0842e-37	4.37412e-36
TTC4	1.74427	0.657601	-1.08667	1.33384e-35	7.62271e-35
CLEC14A	1.76549	3.06039	1.2949	8.10872e-39	5.70435e-38
ABCA5	3.39553	2.00397	-1.39156	1.01496e-36	6.17653e-36
PSMA2	4.56321	2.30364	-2.25956	2.63304e-54	6.54875e-53
ATF5	8.66995	6.48614	-2.1838	5.81235e-28	2.13752e-27
CES4A	2.73219	0.989049	-1.74314	7.36977e-44	7.42935e-43
AL354740.1	1.53973	0.0528279	-1.4869	4.60898e-37	2.88999e-36
IARS2	3.8872	5.11603	1.22883	3.48346e-44	3.60955e-43
AARS2	1.53793	2.59558	1.05765	1.69943e-66	2.20795e-64
AKT2	4.48241	3.17404	-1.30837	1.06716e-49	1.72708e-48
NDC80	0.284517	1.57704	1.29252	5.51718e-66	6.40648e-64
AC126755.1	1.75755	0.137716	-1.61983	2.53114e-34	1.34437e-33
ZBTB22	1.95276	3.09567	1.1429	4.30296e-57	1.39764e-55
AQP3	5.29265	4.04268	-1.24997	1.84462e-31	8.28408e-31
RGPD6	1.61501	0.00262287	-1.61238	2.04928e-41	1.72983e-40
MRPS11	3.58493	2.48769	-1.09724	8.40112e-32	3.85489e-31
METTL18	1.33326	2.3947	1.06144	1.55701e-60	7.67313e-59
NSUN5P1	2.66328	1.3996	-1.26368	5.83134e-14	1.10834e-13
SLCO1B3	3.94599	1.53976	-2.40623	2.70431e-37	1.71831e-36
CCDC34	0.856439	1.95356	1.09712	3.66353e-58	1.32939e-56
2022-03-01	3.62338	2.6087	-1.01468	2.17944e-25	7.03962e-25
HLA-B	7.42398	8.74937	1.32539	8.04106e-27	2.79766e-26
AC010422.3	1.74719	0.448716	-1.29848	2.02531e-35	1.14511e-34
RAMP2	2.26567	3.41172	1.14604	6.43853e-31	2.81198e-30
PPIAP29	0.780392	1.81237	1.03198	6.8325e-36	3.96319e-35
EIF6	5.67682	6.71361	1.03679	7.78891e-58	2.70993e-56
FEN1	1.7912	3.63049	1.83929	2.7787e-66	3.39641e-64
SERF2	7.48801	6.12667	-1.36133	3.52436e-22	9.62786e-22
NUDT22	3.73733	2.68318	-1.05414	2.51098e-36	1.49142e-35
ACAT1	7.07516	5.48852	-1.58664	3.60821e-58	1.31188e-56
KALRN	2.01038	0.999507	-1.01088	1.31181e-55	3.71525e-54
PRUNE1	2.23339	3.37308	1.13969	2.42008e-55	6.58311e-54
MT-TY	1.13543	2.46212	1.32669	3.64437e-19	8.67839e-19
RNVU1-18	1.4404	0.0168751	-1.42352	6.13755e-57	1.94922e-55
SLC50A1	3.98959	5.09135	1.10176	4.53746e-46	5.41088e-45
PMM2	2.88668	1.2267	-1.65998	2.41559e-42	2.19781e-41
DNASE1L3	4.23101	2.11427	-2.11674	2.04982e-43	2.00757e-42
AL590133.2	2.00114	0	-2.00114	1.66889e-69	3.56395e-67
NAGA	3.0327	4.03685	1.00414	5.55254e-25	1.75205e-24
AC087164.2	1.70214	0.569406	-1.13273	3.54686e-29	1.39642e-28
NDUFA11	5.66718	3.88208	-1.78511	5.69356e-37	3.54255e-36
AC138969.1	3.60884	0.0348622	-3.57398	1.28193e-32	6.183e-32
XIST	1.75359	0.522773	-1.23082	7.02474e-17	1.51548e-16
RCC2	2.48518	3.62706	1.14188	7.89699e-51	1.41075e-49
AC104461.1	1.802	2.85463	1.05263	1.15531e-18	2.68945e-18
TXNDC5	3.8315	1.16154	-2.66996	2.06296e-41	1.7398e-40
TMEM14C	4.88295	6.24309	1.36015	2.12304e-64	1.84318e-62
TUT4	2.71979	1.29045	-1.42933	2.81862e-34	1.49322e-33
BOP1	2.8847	4.2666	1.3819	4.42406e-53	9.70421e-52
MAMDC4	3.1982	1.95484	-1.24337	1.44288e-25	4.70138e-25
PHKG2	3.30796	2.16298	-1.14498	5.62977e-33	2.76781e-32
PHLDB2	2.97222	1.73125	-1.24097	3.62787e-60	1.68085e-58
BAIAP2	4.14613	2.91361	-1.23252	8.43655e-42	7.33817e-41
TDO2	6.50432	4.1957	-2.30862	1.13527e-34	6.16909e-34
PAK1IP1	2.14049	3.25498	1.11449	2.76327e-45	3.0927e-44
AC009120.2	1.72888	0.621545	-1.10733	4.32119e-22	1.17631e-21
CAMTA2	3.43114	2.2683	-1.16285	6.55454e-48	9.05404e-47
SPC24	0.444299	2.16032	1.71603	1.04001e-64	9.56548e-63
ALDH2	7.69246	6.01522	-1.67724	6.01863e-56	1.74992e-54
CNDP1	3.21919	0.673782	-2.54541	3.58946e-59	1.45376e-57
RPL37A	8.07297	6.35948	-1.7135	2.65544e-23	7.66792e-23
TPRG1	1.82363	0.482483	-1.34115	3.33372e-53	7.38227e-52
POLE	2.79936	1.69527	-1.10408	1.08828e-35	6.24823e-35
PIK3C3	2.40832	1.22158	-1.18674	7.61487e-50	1.24979e-48
IGF1	2.63061	0.851409	-1.7792	3.98605e-54	9.73151e-53
FAM160B2	3.38936	2.04708	-1.34229	1.66252e-30	7.06012e-30
MPPED1	2.37104	1.13929	-1.23175	8.45057e-34	4.35877e-33
DNAJC12	3.88035	2.42216	-1.45819	1.82488e-28	6.89816e-28
GPRC5C	5.46005	4.25069	-1.20936	1.04701e-36	6.36354e-36
SNN	1.5997	2.68243	1.08273	2.40358e-39	1.75604e-38
SMG1P7	1.68066	0.445262	-1.2354	3.00807e-41	2.50839e-40
BCHE	4.44773	3.05944	-1.38829	5.02886e-18	1.14121e-17
YWHAB	4.30662	5.45847	1.15185	1.05638e-52	2.24303e-51
ACSM2B	6.62519	4.4711	-2.15409	2.58844e-37	1.64933e-36
C6orf106	4.47498	5.71188	1.2369	3.35476e-49	5.21574e-48
SNORD60	0.112552	1.12531	1.01276	4.31577e-52	8.73449e-51
MT1X	9.15314	4.7678	-4.38535	1.30404e-60	6.49537e-59
EIF4E	2.26017	1.07429	-1.18588	4.41621e-56	1.3003e-54
CCDC84	2.80632	1.55544	-1.25088	1.80032e-21	4.7478e-21
IFRD1	3.14433	2.0338	-1.11052	5.40566e-22	1.46616e-21
C1QTNF5	1.34636	0	-1.34636	4.941e-71	1.63928e-68
PLK1	0.590696	1.6078	1.01711	1.59742e-39	1.18385e-38
CHMP4B	4.47322	5.95895	1.48573	1.01706e-54	2.59917e-53
SH3BP2	2.9924	1.90947	-1.08293	1.67013e-39	1.23573e-38
AC007192.2	1.08212	0	-1.08212	1.76159e-66	2.24075e-64
COA6-AS1	0.865813	1.99991	1.1341	3.01731e-46	3.6378e-45
NBPF8	2.74433	0.776096	-1.96824	9.43638e-50	1.53653e-48
MRPS10	3.35562	4.45354	1.09792	1.55211e-48	2.26881e-47
COMT	5.80244	4.57419	-1.22825	8.50641e-42	7.38893e-41
C11orf96	4.35429	2.42092	-1.93337	6.22998e-37	3.86596e-36
AC027117.2	1.32463	2.60899	1.28436	1.21372e-19	2.95153e-19
PAPSS1	1.58413	2.63852	1.05439	3.40533e-50	5.8097e-49
UGT1A3	2.55724	1.12176	-1.43548	4.32385e-33	2.13481e-32
AGAP5	1.22736	0.0696661	-1.1577	2.9629e-30	1.24093e-29
PSMD6	3.69796	2.68252	-1.01544	7.04411e-41	5.70251e-40
GOLGA8B	3.07592	1.77645	-1.29947	3.79706e-16	7.92469e-16
TESC	1.39719	2.67537	1.27819	2.02406e-11	3.44968e-11
TUBE1	3.09139	1.21705	-1.87434	6.07597e-69	1.22701e-66
RBM23	3.14216	2.02585	-1.11631	5.34476e-43	5.0871e-42
WASH2P	1.99115	0.948842	-1.04231	2.00713e-23	5.82664e-23
UGT2B4	6.68291	7.90213	1.21922	1.33937e-19	3.24855e-19
MTPN	3.30887	4.42434	1.11547	1.22237e-42	1.13156e-41
RF00002	1.46303	0.0170168	-1.44602	1.31777e-62	8.65117e-61
CUL7	1.92651	3.0206	1.09409	9.87191e-64	7.70631e-62
SLX1B	1.53483	0.0133073	-1.52153	5.8316e-30	2.40287e-29
PLIN5	5.00563	3.27086	-1.73477	4.43178e-37	2.78075e-36
FAM214A	2.98577	1.85604	-1.12973	3.58046e-48	5.06636e-47
IL4R	4.61353	3.49317	-1.12036	5.72712e-38	3.82336e-37
EXOC3L4	4.64477	2.78179	-1.86298	3.10572e-38	2.10896e-37
AL031600.3	1.56555	0	-1.56555	1.66889e-69	3.56395e-67
NNMT	9.10142	5.63388	-3.46754	8.47075e-49	1.27123e-47
RING1	3.93086	5.01847	1.08761	9.91157e-56	2.82868e-54
GYS2	4.29301	2.96908	-1.32393	9.59906e-14	1.80306e-13
SNRPGP2	1.58	2.85667	1.27668	1.00862e-41	8.72808e-41
ORM2	10.5862	9.30856	-1.27764	7.77949e-30	3.18149e-29
AZGP1P1	3.85111	2.45527	-1.39584	1.80721e-33	9.14381e-33
IMPAD1	2.97733	3.97947	1.00214	1.93938e-33	9.78855e-33
MIR25	0.268899	1.71172	1.44282	2.12983e-56	6.42372e-55
MTND4P20	4.48441	2.7493	-1.73511	8.24783e-22	2.21832e-21
SMC3	2.17601	3.23192	1.0559	6.46011e-41	5.24573e-40
RNY4P10	0.147218	1.36244	1.21522	1.6665e-63	1.24846e-61
RND3	4.13745	3.1053	-1.03215	1.05808e-21	2.82606e-21
MGST1	8.01528	6.01915	-1.99614	1.4947e-52	3.12726e-51
RPS12	8.39667	9.65977	1.26311	2.05942e-45	2.32595e-44
AP001318.2	0.696771	1.7653	1.06853	1.84353e-31	8.28117e-31
LINC02428	3.0638	1.77804	-1.28576	7.94598e-21	2.03682e-20
DDRGK1	4.70823	5.73044	1.02221	1.5032e-47	2.00948e-46
FTL	11.6633	13.4647	1.80132	1.84845e-52	3.84143e-51
LRRC42	2.64754	3.70438	1.05684	1.37864e-50	2.42324e-49
AFP	1.61475	3.12063	1.50588	0.0035831	0.00423503
CD302	4.18619	2.67446	-1.51174	3.40703e-51	6.38096e-50
HLA-DMA	3.1235	4.15601	1.03251	1.01791e-17	2.27883e-17
AC010132.3	1.04112	0.0156299	-1.02549	4.08128e-46	4.88886e-45
APOF	6.23024	4.09409	-2.13614	1.92153e-27	6.90389e-27
DST	4.20941	1.96767	-2.24174	8.05097e-48	1.10146e-46
AKR7L	3.25542	1.69565	-1.55977	1.96368e-39	1.44431e-38
DNHD1	1.85283	0.523681	-1.32915	4.20306e-26	1.40498e-25
ACTG1	7.92283	9.0595	1.13668	2.78046e-32	1.31112e-31
AC125494.1	1.69322	0.0332892	-1.65993	4.00955e-34	2.10493e-33
FAHD2A	4.51724	2.63558	-1.88166	6.17914e-68	1.02502e-65
COA6	3.20538	4.73845	1.53306	7.47594e-67	1.03653e-64
H2AFZ	4.34044	5.4286	1.08815	2.92841e-43	2.84109e-42
CDC5L	2.03778	3.18554	1.14776	2.20448e-41	1.85662e-40
UPK3BL1	2.58738	0.320425	-2.26696	3.1047e-33	1.54893e-32
NENF	4.30061	5.77599	1.47539	3.7444e-56	1.10776e-54
DUSP9	0.369605	2.15817	1.78856	5.31031e-51	9.69158e-50
AC068831.4	2.25765	0	-2.25765	4.941e-71	1.63928e-68
RBPMS	4.48083	2.61412	-1.8667	1.83579e-46	2.2513e-45
ANP32B	4.55592	5.76601	1.21009	4.54923e-40	3.50415e-39
NOL7	3.53117	4.68476	1.15359	2.41658e-65	2.49431e-63
PPIL1	2.79363	3.9284	1.13477	5.5731e-47	7.09197e-46
AC114291.1	2.21073	0.926069	-1.28466	2.63632e-28	9.87702e-28
ETFDH	5.00977	3.48746	-1.52231	6.82967e-56	1.97646e-54
DES	1.59877	0.440374	-1.15839	2.53459e-47	3.3069e-46
GGT1	4.4792	3.04213	-1.43707	1.78513e-23	5.20004e-23
PNMA1	1.35105	2.47827	1.12722	9.52202e-44	9.51639e-43
AC135048.1	1.78972	0.460527	-1.3292	4.16808e-55	1.09842e-53
IGSF8	4.09596	5.46279	1.36683	7.4326e-44	7.48457e-43
HSD11B1	6.96495	5.73979	-1.22515	0.00070533	0.00086349
ADH1B	8.37231	6.67272	-1.69959	6.44982e-18	1.45762e-17
BAIAP2-DT	1.39419	2.45169	1.0575	9.20537e-48	1.25294e-46
AC093673.1	1.60463	2.91229	1.30765	1.33832e-40	1.06214e-39
BCAP31	5.45304	6.96772	1.51469	5.73051e-68	9.59163e-66
SDC2	5.40656	6.51381	1.10726	1.17897e-34	6.39725e-34
NAXE	4.67642	6.07493	1.39851	2.60726e-66	3.22935e-64
RPL41P1	2.15154	6.93709	4.78556	9.82379e-38	6.45161e-37
AC138696.2	0.643053	1.71661	1.07356	5.91802e-43	5.61547e-42
HMGB1	5.2584	4.13985	-1.11856	2.6235e-41	2.19955e-40
SLC6A13	3.0087	1.25996	-1.74874	1.32279e-36	8.01308e-36
KDM8	4.52641	2.04322	-2.48319	4.0522e-52	8.21897e-51
FARSB	2.32005	3.47945	1.1594	8.16389e-59	3.22032e-57
EIF2AK1	4.04602	5.10361	1.05759	6.8553e-50	1.13922e-48
PLP2	3.13073	4.51947	1.38874	5.2595e-25	1.66326e-24
CU633906.1	1.12973	0.0208944	-1.10883	1.12699e-33	5.76496e-33
CYP4F12	4.10594	2.5957	-1.51023	3.30752e-33	1.64526e-32
EIF3C	4.59072	0.702836	-3.88788	1.95668e-35	1.10698e-34
ANKRD37	2.61234	1.29971	-1.31263	5.88198e-40	4.49348e-39
PPP1R11	3.8207	4.82759	1.00689	9.17607e-53	1.97317e-51
ATG16L2	2.66638	1.33473	-1.33165	8.32e-28	3.04406e-27
POLD4	5.33947	3.74055	-1.59891	6.15668e-36	3.57788e-35
GCSHP5	2.83138	0.361438	-2.46994	1.01516e-51	1.977e-50
FP236383.2	5.81635	0.0137373	-5.80261	2.99256e-66	3.6339e-64
FAM111B	0.300705	1.43867	1.13797	1.70204e-55	4.71973e-54
MTND4P12	2.09016	5.14584	3.05568	1.41605e-27	5.11845e-27
APOC1P1	5.98465	4.55292	-1.43174	1.36411e-13	2.54558e-13
HNRNPH2	4.06233	5.07554	1.0132	8.06138e-37	4.95443e-36
NEU4	3.75529	2.20493	-1.55036	3.4322e-24	1.03787e-23
GNPAT	3.28	4.60603	1.32603	2.122e-66	2.64595e-64
ADGRG7	1.95071	0.735529	-1.21518	8.61504e-43	8.06351e-42
MMP14	2.45615	4.02635	1.57019	1.75155e-44	1.85214e-43
CYP51A1	3.33619	1.74432	-1.59187	7.61047e-36	4.40346e-35
NPIPA7	1.69341	0.0032299	-1.69018	1.29055e-58	4.92345e-57
CD81	7.577	5.92165	-1.65535	5.1478e-58	1.83572e-56
HMBOX1	2.13359	1.0748	-1.05879	1.68318e-48	2.45076e-47
RNASEH2A	1.57047	3.35115	1.78068	1.22892e-64	1.09769e-62
RRM2	0.779081	2.58231	1.80323	1.90884e-53	4.36752e-52
EIF4EBP2	3.68504	4.91439	1.22936	8.37901e-36	4.8302e-35
CCDC159	3.54683	2.42897	-1.11786	5.57348e-20	1.37516e-19
SREK1	2.86101	1.60255	-1.25846	2.75771e-27	9.83219e-27
MST1	7.65344	5.20599	-2.44745	1.83961e-59	7.78545e-58
LPCAT3	4.23988	2.32224	-1.91764	9.56631e-50	1.55633e-48
GLS2	4.23511	0.997079	-3.23803	1.46579e-58	5.55774e-57
SARS2	2.82593	1.47485	-1.35108	2.20931e-36	1.31645e-35
CDT1	0.403371	2.0368	1.63343	2.49016e-63	1.79322e-61
GSTT2B	2.65116	1.25428	-1.39688	4.96785e-29	1.94061e-28
ECHDC2	7.23399	3.78425	-3.44974	6.42937e-58	2.25418e-56
SAMHD1	2.43575	3.67558	1.23983	7.31276e-33	3.5716e-32
PIK3R2	1.67377	0.394985	-1.27878	1.21393e-22	3.39102e-22
NFKBIZ	3.45055	1.88522	-1.56533	8.0723e-49	1.21437e-47
ARMH1	2.26987	0.686132	-1.58374	2.88607e-45	3.2282e-44
RAB10	3.63954	4.87057	1.23103	3.74076e-49	5.77719e-48
COPG2	1.43637	2.51849	1.08212	6.23892e-55	1.62571e-53
AC006128.1	1.98778	0.923733	-1.06404	1.02417e-21	2.73786e-21
DHCR24	7.19427	8.33584	1.14157	5.03794e-37	3.14305e-36
BCL3	5.44948	4.23389	-1.21559	6.15231e-32	2.84479e-31
PABPC1L	3.63424	2.33603	-1.29821	2.52226e-15	5.08806e-15
HSF4	3.09286	1.70001	-1.39285	2.33686e-14	4.51455e-14
SORBS3	4.87009	3.7736	-1.09649	1.4976e-50	2.61996e-49
NTF3	1.48859	0.24242	-1.24617	1.53962e-67	2.32558e-65
ELP2	3.89639	2.70052	-1.19587	6.6722e-55	1.73617e-53
IGFBP3	6.48177	4.81967	-1.6621	6.22806e-36	3.61824e-35
FUCA1	3.91028	5.19777	1.28749	4.63744e-21	1.20099e-20
PLCXD2	2.87466	1.43776	-1.43691	8.21933e-49	1.23549e-47
AC139256.2	1.46834	0.282146	-1.1862	1.02861e-31	4.69663e-31
IL3RA	0.796489	2.29034	1.49385	4.62254e-63	3.20456e-61
ZNF410	2.12968	0.213599	-1.91609	1.27254e-43	1.26296e-42
TK1	1.74975	4.05723	2.30748	1.94436e-61	1.07194e-59
SP100	3.60963	2.42107	-1.18856	1.50642e-44	1.60022e-43
CLK1	4.94099	3.24553	-1.69546	1.6472e-38	1.13727e-37
MSI1	0.182939	1.24535	1.06241	1.3081e-16	2.78351e-16
CYP2C9	7.70147	5.85711	-1.84436	3.19292e-22	8.73784e-22
NMB	0.897343	2.19134	1.294	4.20064e-53	9.24689e-52
MTCO1P40	1.14311	2.39116	1.24805	1.57861e-18	3.65653e-18
ACSF3	2.8417	1.66182	-1.17988	9.98685e-53	2.13762e-51
ITPKA	0.673421	2.03177	1.35835	1.00613e-39	7.56798e-39
SLC31A2	1.93165	0.533252	-1.3984	2.29515e-60	1.09337e-58
NACA	6.92787	5.71896	-1.20892	4.07277e-19	9.68116e-19
MRPL53	3.42518	1.7358	-1.68939	1.51816e-16	3.22242e-16
C1RL	5.59655	4.57612	-1.02042	4.92591e-37	3.07625e-36
PMS2P1	1.60508	3.04069	1.43561	3.21677e-54	7.95797e-53
AC012615.3	1.47199	0.000114385	-1.47188	2.22154e-70	6.65708e-68
AL132780.3	1.04218	0	-1.04218	1.66887e-69	3.56395e-67
PDE4DIP	3.14238	1.76625	-1.37613	1.28039e-38	8.91285e-38
HCG25	2.44421	0.532565	-1.91164	3.64398e-15	7.30492e-15
AC008894.2	2.62122	0.0212353	-2.59999	2.30972e-30	9.73731e-30
BEX2	0.800567	1.85785	1.05728	0.000656545	0.000804773
MTHFD2L	2.4501	0.819796	-1.63031	2.52901e-63	1.81415e-61
QPCTL	2.0005	3.08072	1.08022	1.10706e-48	1.6494e-47
SOX4	1.04425	2.42956	1.38531	9.84952e-33	4.77667e-32
FMC1-LUC7L2	1.10322	0.016563	-1.08666	3.935e-27	1.39334e-26
IGFALS	4.81058	2.34303	-2.46754	8.58224e-37	5.26757e-36
MGLL	4.55632	3.51459	-1.04174	2.91564e-30	1.22169e-29
AL355816.2	1.93598	0	-1.93598	4.94106e-71	1.63928e-68
VEGFA	5.489	3.44205	-2.04695	4.49053e-34	2.35211e-33
CBS	4.54491	0.923333	-3.62157	3.96069e-50	6.71402e-49
PIGM	1.41984	2.55412	1.13428	4.14073e-54	1.00826e-52
UBE2M	3.80371	5.00164	1.19793	1.60263e-61	8.96845e-60
GTF2IRD2	1.91726	0.367551	-1.54971	1.79739e-44	1.89737e-43
SAA2-SAA4	4.13207	3.05779	-1.07428	6.03382e-07	8.50807e-07
EEF1A2	1.04684	3.40119	2.35435	1.63097e-14	3.17595e-14
SCARA3	0.938874	2.24013	1.30126	8.7739e-32	4.02097e-31
NDUFB8	5.56122	4.38697	-1.17426	4.99238e-44	5.09355e-43
TAT	7.54033	5.6086	-1.93173	1.93369e-12	3.4425e-12
MTCP1	2.41936	0.41767	-2.0017	3.40146e-49	5.28392e-48
RNF31	2.92683	1.65486	-1.27197	2.09988e-26	7.14407e-26
GLRX	4.66151	2.98699	-1.67451	1.3463e-49	2.16191e-48
IGHM	4.23543	3.00372	-1.23172	2.45038e-12	4.34074e-12
ASPM	0.223324	1.38677	1.16344	9.01805e-62	5.2033e-60
C11orf98	3.51517	2.1193	-1.39587	3.91505e-24	1.18004e-23
MED29	3.05518	4.12797	1.07279	6.21061e-49	9.42704e-48
INTS11	4.22256	3.16739	-1.05516	2.02737e-27	7.27856e-27
S100A9	5.23223	3.71842	-1.51381	2.54523e-27	9.09044e-27
RCL1	4.54028	2.85089	-1.68939	8.26975e-51	1.47168e-49
FYB2	3.00149	1.44869	-1.5528	2.29574e-48	3.29618e-47
CDC20	0.513007	2.90158	2.38858	7.64326e-65	7.17193e-63
CRYAA	1.47393	0.0657148	-1.40821	3.90094e-43	3.75716e-42
AC006329.2	3.04684	1.59583	-1.45101	7.34682e-30	3.00587e-29
MGAT2	2.28025	1.10264	-1.17761	1.11241e-40	8.88539e-40
FOLH1B	1.88839	0.757879	-1.13051	2.15682e-29	8.58616e-29
LINC01595	2.94555	1.59919	-1.34636	6.46291e-17	1.39686e-16
AC116533.1	5.13214	4.00778	-1.12436	1.62277e-22	4.49857e-22
GSTM2	3.1649	0.581667	-2.58323	1.28553e-38	8.94192e-38
AZGP1	9.16295	7.58491	-1.57804	1.52863e-35	8.70109e-35
VXN	1.95729	0.716217	-1.24107	2.29679e-29	9.13553e-29
SERF1B	1.55495	0.0819322	-1.47301	3.21459e-34	1.69718e-33
MCM6	1.25091	3.02195	1.77104	2.49018e-63	1.79322e-61
MCM7	3.1764	4.26115	1.08475	7.46163e-48	1.02539e-46
MAPK8IP3	3.04925	1.78963	-1.25961	3.30882e-19	7.89349e-19
FP565260.6	1.42406	0.364882	-1.05918	1.91201e-37	1.23003e-36
HECTD4	2.20854	1.2012	-1.00734	5.95295e-30	2.45124e-29
RHEBP1	2.20223	0.435631	-1.7666	1.77073e-43	1.74066e-42
PPP1R14BP3	1.99081	4.24187	2.25107	9.43911e-53	2.02739e-51
LRRC37A2	1.47264	0.30134	-1.1713	5.58433e-28	2.0553e-27
QSOX1	3.9265	2.7265	-1.2	3.84776e-21	9.9955e-21
KIF4A	0.175511	1.62917	1.45366	5.23319e-68	9.00255e-66
ANLN	0.260621	1.42523	1.16461	1.22733e-59	5.3029e-58
AC135983.2	1.86919	0.459121	-1.41007	2.61002e-46	3.15703e-45
AP002360.1	1.1472	2.19433	1.04713	4.86664e-44	4.97345e-43
MICALL2	2.93668	1.67999	-1.2567	1.43526e-27	5.18585e-27
CCL14	3.45885	0.864926	-2.59392	1.41428e-67	2.20806e-65
KIFC3	3.86978	2.71602	-1.15376	2.34003e-26	7.94362e-26
NDUFA13	5.43751	3.87732	-1.56019	4.53888e-36	2.65767e-35
INO80B-WBP1	1.04313	0.0135603	-1.02957	2.85469e-33	1.42765e-32
AKAP8L	4.04711	3.01898	-1.02813	1.63364e-15	3.32036e-15
KRT23	0.645401	2.20511	1.55971	4.70145e-10	7.56197e-10
MT-ND4L	12.3209	10.8951	-1.42579	1.25454e-28	4.78509e-28
LRCH4	2.8818	1.15616	-1.72564	2.32352e-36	1.38229e-35
NDUFA8	4.35114	5.71973	1.36859	2.28138e-56	6.84746e-55
KLHDC3	4.49251	5.95057	1.45806	1.02064e-58	3.97537e-57
RRS1	2.36641	4.0133	1.64689	1.01097e-47	1.37201e-46
SYPL1	3.96084	4.98748	1.02664	2.17935e-46	2.65858e-45
CCDC196	1.53205	0.364364	-1.16769	2.13856e-47	2.80993e-46
POLR3C	2.01561	3.04168	1.02607	4.00787e-56	1.18382e-54
AC009630.3	1.7201	0	-1.7201	4.941e-71	1.63928e-68
KMO	3.57342	1.82048	-1.75294	2.08571e-46	2.55104e-45
MRPL24	5.04707	6.25078	1.20371	4.16457e-58	1.5024e-56
NPIPA5	1.79693	0.561641	-1.23529	4.66386e-26	1.55537e-25
THBS4	0.177464	1.69433	1.51687	8.81721e-54	2.08681e-52
KIAA0391	1.75663	0.577578	-1.17905	1.11055e-50	1.95759e-49
FCN2	4.29896	0.928647	-3.37032	2.75594e-59	1.13784e-57
PKLR	4.05487	5.17258	1.11771	6.75667e-13	1.2277e-12
PBXIP1	3.45059	5.08827	1.63768	1.99622e-54	5.0051e-53
SLC51A	4.94507	3.32707	-1.618	1.14347e-23	3.36786e-23
FAM20B	2.01279	3.48315	1.47036	1.58874e-60	7.80876e-59
TSR2	3.63234	4.84073	1.20839	1.32355e-44	1.41161e-43
SLC25A6	5.42229	6.82388	1.40159	9.11147e-54	2.15098e-52
TM9SF2	4.63658	5.78008	1.1435	4.23912e-31	1.86499e-30
LINC01831	2.80937	1.51697	-1.29239	6.32765e-23	1.79319e-22
C11orf52	1.7635	0.0884911	-1.67501	4.32047e-42	3.84619e-41
HIST2H2AA3	2.84122	0.0343256	-2.8069	8.42865e-41	6.77904e-40
SNRPB	4.81339	6.84316	2.02977	7.21373e-70	1.88766e-67
CUL3	3.38259	2.1511	-1.23149	3.66349e-53	8.10286e-52
SPSB3	3.54166	0.703412	-2.83825	3.55917e-44	3.67979e-43
IFI6	4.93745	6.59762	1.66017	2.62349e-23	7.57921e-23
AP001043.1	1.54331	0.389824	-1.15348	4.9665e-39	3.55715e-38
HKDC1	1.18589	2.89139	1.7055	1.97817e-29	7.88679e-29
SNTA1	2.47727	3.67555	1.19828	1.27794e-43	1.26702e-42
SNHG25	0.93383	2.13078	1.19695	6.32898e-44	6.40447e-43
HIST1H2AE	1.21408	2.32491	1.11082	6.19716e-24	1.8524e-23
CU633967.1	1.39692	0.0175712	-1.37935	3.50299e-35	1.95324e-34
AL627309.6	2.33769	0.884336	-1.45335	2.97051e-26	1.00271e-25
AC012321.1	2.12236	0	-2.12236	4.941e-71	1.63928e-68
AC125611.3	2.65061	0.00263904	-2.64797	5.05366e-58	1.80909e-56
DIABLO	2.93692	1.03437	-1.90255	3.27068e-38	2.21854e-37
UGT1A4	5.42935	3.20035	-2.229	2.05642e-25	6.64687e-25
TNFRSF4	0.410513	1.59604	1.18553	1.1407e-65	1.24666e-63
PCDHGC3	2.24731	0.579817	-1.66749	4.35208e-55	1.14367e-53
ADIPOR1	4.45454	5.592	1.13746	1.38197e-56	4.25153e-55
AC018557.1	1.31801	0	-1.31801	4.94106e-71	1.63928e-68
SFXN5	3.6777	2.57992	-1.09779	6.79574e-39	4.81534e-38
CKAP4	3.25515	5.01369	1.75854	8.901e-58	3.06812e-56
NPIPB5	3.61523	0.0940854	-3.52114	1.06846e-34	5.81798e-34
IGF2	5.98886	4.47141	-1.51745	2.02509e-13	3.75134e-13
CSRP1	4.57011	3.46857	-1.10154	7.84491e-37	4.82778e-36
BAMBI	2.54668	3.60929	1.06261	3.63946e-20	9.05672e-20
APOC2	6.8571	5.31642	-1.54068	1.75825e-26	6.01594e-26
TBRG1	2.96201	1.81991	-1.1421	2.41143e-46	2.92631e-45
AHI1	1.80854	0.756076	-1.05246	9.58406e-38	6.29863e-37
FBXO9	3.83665	2.81296	-1.0237	5.78216e-23	1.64186e-22
OAT	4.16487	3.03287	-1.132	4.03461e-16	8.40914e-16
AC024267.6	1.397	0.0102541	-1.38675	3.90103e-38	2.63362e-37
AC087393.2	1.65573	0	-1.65573	3.12052e-67	4.56505e-65
CLK4	2.38104	1.36113	-1.01991	4.87638e-40	3.74993e-39
APOC4	4.9329	0.779588	-4.15331	8.67351e-50	1.41604e-48
AC009022.1	2.42921	0.781114	-1.64809	1.11764e-30	4.80219e-30
TP53BP2	2.2864	3.36082	1.07442	2.28254e-37	1.46031e-36
TEN1	2.42573	0.172181	-2.25355	3.05738e-41	2.54753e-40
HNRNPH1	5.86541	4.09742	-1.76798	1.9549e-21	5.14302e-21
UPB1	5.40226	4.22467	-1.17759	2.63505e-17	5.7897e-17
CD68	2.65848	0.785651	-1.87283	2.49698e-47	3.26011e-46
ANAPC15	3.04281	1.98874	-1.05407	9.84941e-33	4.77667e-32
MKI67	0.319538	1.64764	1.3281	1.00969e-59	4.3932e-58
STMN1	2.10922	3.58406	1.47485	1.07755e-48	1.60802e-47
CTSD	7.6402	8.95544	1.31523	3.7513e-46	4.50519e-45
PLXNB1	4.98915	3.75221	-1.23694	2.88491e-30	1.20963e-29
KLB	2.24655	3.40622	1.15967	1.96637e-26	6.6997e-26
PDRG1	2.26552	3.41374	1.14822	6.43304e-61	3.32923e-59
BBS1	1.39848	0.201115	-1.19737	4.74755e-27	1.67594e-26
MSRA	3.91295	2.76264	-1.15031	7.81805e-45	8.50419e-44
ABLIM3	4.66393	3.09574	-1.56819	5.09017e-49	7.77717e-48
CHKB-CPT1B	1.32019	0.182158	-1.13804	1.10662e-35	6.34959e-35
BROX	2.17349	3.20816	1.03467	8.18054e-60	3.59319e-58
GSS	3.82934	4.97034	1.141	5.05557e-47	6.44663e-46
RNU5B-2P	0.447669	1.47188	1.02421	7.70325e-38	5.09138e-37
CDC25C	0.127293	1.25564	1.12835	2.95181e-65	2.98052e-63
CALR	7.61343	9.14578	1.53235	8.43801e-60	3.6974e-58
ITFG2	2.68121	1.59493	-1.08627	6.73432e-23	1.90553e-22
MT2A	10.049	7.15369	-2.89533	3.55191e-49	5.51009e-48
GET4	3.33687	0.826218	-2.51065	4.81195e-37	3.01014e-36
GUSBP11	1.85184	0.26174	-1.5901	2.2213e-17	4.90136e-17
LINC01419	0.000788063	1.4289	1.42812	1.43458e-36	8.6508e-36
HIST1H4I	1.02455	3.42059	2.39604	2.42931e-53	5.48409e-52
HIST1H4H	0.431395	1.6562	1.22481	2.1227e-42	1.93702e-41
TOP3B	1.84264	0.0730341	-1.7696	7.24647e-27	2.52925e-26
BCKDHA	3.51955	1.47662	-2.04293	6.43045e-58	2.25418e-56
AVPR1A	2.51473	1.25641	-1.25832	4.86936e-22	1.32244e-21
GLO1	4.44959	5.70385	1.25426	9.48032e-39	6.6491e-38
DUSP23	5.53138	6.68676	1.15538	3.85935e-45	4.27148e-44
SPP1	2.90642	5.72296	2.81655	2.09666e-20	5.28116e-20
SCGN	0.816357	2.22567	1.40932	7.29133e-20	1.79116e-19
SRSF11	4.81906	3.23647	-1.58259	4.94249e-30	2.04297e-29
AKR1D1	4.40892	3.30029	-1.10864	1.49786e-09	2.35818e-09
FITM1	2.61607	1.07442	-1.54165	2.15288e-50	3.73468e-49
NUDT2	2.97657	4.13558	1.15901	2.43377e-48	3.48098e-47
NBPF15	2.61037	1.16945	-1.44092	5.35898e-36	3.1231e-35
AC125232.1	1.91298	0.898612	-1.01436	2.21281e-43	2.16264e-42
MYO7A	2.76788	1.74724	-1.02064	1.3597e-35	7.7657e-35
AC114546.3	1.9469	0	-1.9469	4.941e-71	1.63928e-68
HERC3	2.27591	1.17817	-1.09774	3.18794e-43	3.08322e-42
HIST1H2AC	4.07543	5.33366	1.25824	4.53049e-26	1.51175e-25
MACF1	3.61655	1.71628	-1.90027	2.22484e-51	4.21358e-50
GOLPH3L	1.88082	3.08272	1.2019	1.65593e-63	1.24557e-61
BRMS1	3.1709	4.2104	1.03949	1.42727e-57	4.83011e-56
SLC22A9	2.72504	3.86856	1.14352	2.58716e-17	5.68773e-17
CCNE1	0.317664	1.32899	1.01133	1.23797e-55	3.52223e-54
HJURP	0.343687	1.51572	1.17203	9.60435e-55	2.46463e-53
CEBPA-DT	1.22546	2.35721	1.13175	4.79057e-38	3.2143e-37
AL606760.2	1.40957	0.32941	-1.08016	8.11015e-25	2.5354e-24
ROMO1	5.67502	6.69057	1.01555	6.68689e-51	1.20617e-49
BLVRA	1.70116	3.4226	1.72144	1.62998e-46	2.01487e-45
MYBL2	0.379733	2.60204	2.2223	5.97216e-64	4.86653e-62
MTUS1	3.76035	2.70935	-1.051	5.75562e-41	4.69832e-40
SMN2	2.28261	0.94333	-1.33928	4.5361e-29	1.77573e-28
AC107983.1	0.765256	1.94737	1.18211	8.2206e-32	3.77485e-31
FRMD4A	2.21208	0.995788	-1.21629	9.25305e-45	9.9891e-44
HOGA1	3.65035	2.1974	-1.45295	2.38735e-35	1.34448e-34
LIMS2	3.48304	2.27213	-1.21092	4.3673e-36	2.55801e-35
ALOX12P2	1.86936	0.457818	-1.41154	6.346e-39	4.50697e-38
DBH	3.23016	1.19533	-2.03483	2.47915e-55	6.70453e-54
STEAP4	2.18005	0.975188	-1.20486	1.62153e-41	1.38131e-40
S100P	1.7172	2.77823	1.06102	0.0415675	0.0459911
DOLK	2.1466	3.56432	1.41772	3.78584e-55	1.00338e-53
COLEC11	5.10579	3.19114	-1.91465	1.27393e-40	1.0132e-39
IGHG1	5.64741	4.45778	-1.18963	2.72131e-08	4.06494e-08
PYGB	2.44909	4.1078	1.65871	3.9606e-63	2.78727e-61
SORT1	1.24317	2.71731	1.47414	6.72948e-46	7.8782e-45
LY6E	6.99581	4.61886	-2.37695	6.14741e-41	5.00275e-40
SLC13A5	6.38848	4.10337	-2.28511	1.11553e-46	1.39097e-45
SREBF1	5.79398	4.35075	-1.44323	3.09421e-33	1.54411e-32
RPL17-C18orf32	1.15913	0.00830126	-1.15083	1.11826e-39	8.38763e-39
AKT1	4.4272	3.11395	-1.31325	8.49479e-59	3.34374e-57
ATOH8	3.37389	1.39196	-1.98193	7.54604e-50	1.23959e-48
CRYZL2P-SEC16B	1.64337	0.509336	-1.13404	1.05656e-34	5.75653e-34
NEIL1	3.1905	1.50068	-1.68981	2.36968e-33	1.1899e-32
CDKN2AIPNL	2.42429	3.73157	1.30727	1.53831e-62	9.99308e-61
CLGN	0.857146	1.86955	1.0124	4.61734e-15	9.20842e-15
NUDT6	2.08753	0.728021	-1.3595	3.91082e-54	9.57302e-53
TPT1-AS1	2.03145	0.453582	-1.57787	5.48837e-40	4.20662e-39
MIR647	0.340778	1.99689	1.65611	2.22078e-53	5.03783e-52
FHL2	2.31223	1.30128	-1.01095	3.42134e-26	1.14883e-25
PRSS2	1.56402	0.200426	-1.3636	1.5521e-17	3.45307e-17
CCL15-CCL14	3.27126	1.54678	-1.72447	2.66899e-47	3.47736e-46
CKS2	2.93803	4.73138	1.79335	6.22877e-50	1.03975e-48
RN7SL1	4.2699	0	-4.2699	4.94069e-71	1.63928e-68
CHCHD2	6.38463	7.39773	1.0131	1.17696e-57	4.01226e-56
RBM25	3.23646	2.21763	-1.01883	1.32581e-32	6.39135e-32
KIF2C	0.274168	1.70697	1.4328	4.32286e-65	4.18304e-63
AC018521.2	1.66312	0	-1.66312	5.87435e-57	1.86883e-55
LINC00313	1.33901	0.185722	-1.15329	5.92793e-36	3.4471e-35
PCCA	4.43196	3.15657	-1.27539	4.52979e-53	9.91271e-52
KYNU	3.02358	1.52715	-1.49643	6.00542e-50	1.00427e-48
CD93	1.47966	2.67319	1.19353	1.29601e-31	5.88429e-31
C11orf68	3.1283	4.2063	1.07799	1.56457e-54	3.93878e-53
ZMPSTE24	3.09679	4.21509	1.11831	8.80284e-48	1.19991e-46
RESF1	3.67036	2.53539	-1.13497	1.10064e-37	7.18509e-37
PYURF	3.26829	1.41612	-1.85216	3.86417e-48	5.4595e-47
LPAL2	2.57311	1.04151	-1.5316	3.3233e-46	3.99377e-45
RNASEK	4.88312	2.06345	-2.81967	1.75104e-35	9.92755e-35
MON2	2.79097	1.54448	-1.2465	1.79535e-52	3.74784e-51
RPL31	7.68183	6.37818	-1.30365	9.23762e-23	2.59528e-22
RECQL4	1.05612	2.37395	1.31783	4.6876e-51	8.62286e-50
AC092718.4	1.9116	2.93789	1.0263	2.21281e-32	1.05172e-31
RPL41P5	1.50653	5.30363	3.7971	6.99962e-50	1.15906e-48
PRDX5	6.47049	8.07045	1.59997	2.04304e-61	1.12301e-59
AC129492.1	4.58461	3.19667	-1.38794	3.97408e-43	3.81968e-42
DECR2	5.61756	4.53279	-1.08477	8.67878e-32	3.97836e-31
AL161787.1	0.655118	1.80923	1.15411	4.24472e-35	2.35622e-34
HLA-G	0.545993	1.77066	1.22467	1.08096e-40	8.64532e-40
B4GAT1	2.8198	4.20231	1.38251	6.04213e-42	5.32527e-41
EXOSC5	2.85511	4.0937	1.23859	4.88442e-53	1.06387e-51
YBX3	3.58415	1.96195	-1.6222	2.3374e-32	1.10895e-31
AARSD1	2.78174	1.06616	-1.71559	3.62599e-19	8.63684e-19
TNFSF14	3.42385	1.9261	-1.49776	9.97605e-24	2.94854e-23
MRRF	2.91306	1.65345	-1.25961	3.68643e-27	1.30682e-26
AC138035.1	1.31649	0.118803	-1.19768	4.03483e-31	1.77638e-30
PSMC1P5	2.53635	0.0783319	-2.45802	1.54604e-41	1.31821e-40
SLC39A7	5.00564	6.18296	1.17732	1.75185e-55	4.84339e-54
NRAS	2.34222	3.67598	1.33375	1.90056e-48	2.75863e-47
MRPL15	4.23345	5.55083	1.31738	2.71052e-48	3.86483e-47
KIAA1522	2.06194	3.69	1.62807	9.78358e-62	5.5929e-60
ACSL1	7.68283	5.89181	-1.79103	6.59279e-42	5.78332e-41
ERLEC1	3.40855	4.55567	1.14712	5.41127e-52	1.08688e-50
RGPD2	1.08539	0.0739588	-1.01143	3.11053e-59	1.27855e-57
FXYD1	5.8722	2.44522	-3.42698	1.12739e-58	4.3728e-57
PPP2R5A	3.67769	4.87774	1.20004	4.52246e-50	7.64629e-49
ARMCX7P	1.11753	0.00780456	-1.10973	3.53932e-54	8.7211e-53
AC073896.4	1.39239	2.72977	1.33737	1.05206e-39	7.90706e-39
HSD17B2	4.82159	3.24384	-1.57775	3.18916e-45	3.55224e-44
ACACB	3.90433	2.61064	-1.29369	5.94881e-41	4.84537e-40
APOA5	7.01828	5.98938	-1.0289	9.28318e-08	1.35677e-07
THUMPD3-AS1	2.49177	1.28036	-1.21141	6.12356e-17	1.32475e-16
NQO2	4.21642	2.96767	-1.24875	4.00821e-32	1.87436e-31
AC132217.1	4.93447	0	-4.93447	4.93988e-71	1.63928e-68
PLGLB2	5.34559	1.08453	-4.26106	8.03607e-71	2.57417e-68
SNORD14A	0.474668	2.04908	1.57441	2.32927e-48	3.33915e-47
CCNA2	0.547595	2.15526	1.60766	1.49944e-62	9.77479e-61
JCAD	0.563899	1.6535	1.0896	2.2698e-59	9.51931e-58
PCNA	3.52399	5.52765	2.00367	1.22877e-64	1.09769e-62
IGKV3-11	3.6455	2.44787	-1.19764	3.3688e-15	6.7671e-15
PHKA2	4.47162	3.06248	-1.40915	5.36566e-41	4.39544e-40
PRR4	1.20235	0.194088	-1.00826	1.59903e-30	6.79516e-30
ATXN2	2.81572	1.71189	-1.10383	9.20212e-24	2.7263e-23
SMIM12	3.85412	2.41363	-1.44049	2.81918e-58	1.03309e-56
ENOSF1	4.21651	2.35992	-1.85658	1.5765e-45	1.79692e-44
EMC6	3.59782	2.14553	-1.45229	8.91102e-43	8.32367e-42
NPC1L1	3.43726	2.33828	-1.09898	3.57979e-08	5.32625e-08
LOXL4	1.19803	2.40527	1.20724	2.92012e-14	5.6244e-14
AC013489.3	1.16669	0.103174	-1.06351	5.78204e-27	2.03109e-26
VTN	9.99102	11.0411	1.05007	1.13066e-32	5.46475e-32
MTFR1L	4.25678	3.17914	-1.07764	1.76442e-46	2.1695e-45
SMIM11B	1.68587	0.00258298	-1.68329	4.49793e-43	4.30758e-42
IGSF9	2.70811	1.37238	-1.33573	1.31618e-26	4.53174e-26
GPS2	3.16657	0.848714	-2.31786	2.0175e-25	6.5222e-25
AC145207.3	1.40711	0	-1.40711	1.76159e-66	2.24075e-64
DTYMK	2.5005	3.50791	1.00741	1.22247e-51	2.37327e-50
AC099850.3	0.155452	1.30424	1.14879	7.24447e-55	1.8772e-53
RPL27A	7.58348	6.27224	-1.31124	7.65103e-23	2.15736e-22
CSE1L	2.98637	4.30206	1.31569	1.04496e-63	8.12315e-62
NDST2	1.75276	0.406789	-1.34597	7.28467e-27	2.54211e-26
IDO2	1.57698	0.326338	-1.25064	4.39961e-47	5.63727e-46
KIF11	0.306739	1.38473	1.07799	1.58655e-66	2.08917e-64
MASP1	4.63564	2.97844	-1.6572	2.06426e-59	8.69658e-58
AGXT	8.97021	7.39057	-1.57963	3.13289e-28	1.16903e-27
PFN1P11	0.18482	1.19321	1.00839	2.80562e-20	7.01839e-20
LINC01554	5.21985	2.45479	-2.76506	2.16434e-28	8.14654e-28
RNA5-8SN3	5.02478	0.00239715	-5.02238	1.72657e-68	3.1449e-66
CCDC86	2.30822	3.39616	1.08795	6.84498e-51	1.23349e-49
INHBB	2.33449	3.52306	1.18857	1.28088e-19	3.11038e-19
NDUFA6-DT	3.22954	1.07671	-2.15283	2.01129e-38	1.37837e-37
NOTCH3	0.958767	2.3999	1.44114	2.04916e-53	4.6722e-52
COPA	3.93896	5.35363	1.41467	4.52211e-55	1.185e-53
COL5A2	1.58009	2.70885	1.12876	9.28738e-33	4.51112e-32
F9	6.60188	5.04663	-1.55525	1.23238e-13	2.30439e-13
TYMSOS	0.588236	1.77926	1.19102	7.50357e-46	8.75134e-45
CTC1	2.45708	1.40813	-1.04895	6.94155e-44	7.0167e-43
HMGN2P5	2.1607	1.14777	-1.01293	9.06339e-27	3.14393e-26
AC027796.3	1.22671	0.0401938	-1.18652	1.40154e-48	2.05844e-47
TTN-AS1	1.13941	0.0859065	-1.05351	6.95518e-38	4.61007e-37
PSMC4	4.49073	5.52056	1.02983	4.10938e-62	2.50322e-60
ZWINT	0.931335	2.86198	1.93064	2.92236e-60	1.37455e-58
AASS	3.20285	1.84974	-1.35312	1.09978e-28	4.20513e-28
HPD	8.74912	7.3648	-1.38432	0.0241408	0.0271727
FAM193B	4.13712	2.54576	-1.59136	1.62059e-18	3.75189e-18
ISG15	4.62531	5.68068	1.05537	1.1642e-19	2.83444e-19
GTF2IRD2B	2.37616	0.749518	-1.62664	6.9467e-48	9.5815e-47
IDH3A	2.66846	1.39284	-1.27562	7.5299e-47	9.46536e-46
TPSP2	0.429041	1.6109	1.18185	8.16807e-40	6.19154e-39
PSPHP1	0.653558	3.39101	2.73745	5.7725e-29	2.24743e-28
AP1S1	3.70338	5.11418	1.4108	9.58557e-62	5.49662e-60
TP53I13	3.97555	2.8558	-1.11975	1.69073e-20	4.27318e-20
ABCD1	2.10108	3.11503	1.01395	2.11822e-47	2.78714e-46
RNF123	3.6319	2.4394	-1.1925	1.41745e-40	1.1235e-39
PCBP2	6.18602	5.07155	-1.11447	1.65235e-37	1.06742e-36
C19orf66	5.66831	3.97361	-1.6947	2.77288e-53	6.2144e-52
LINC02362	3.58072	1.45892	-2.12181	3.28864e-47	4.25782e-46
ACSL4	1.8251	4.53794	2.71284	2.23807e-37	1.43284e-36
ETV4	0.538509	2.0769	1.53839	2.90507e-26	9.80977e-26
RTEL1	1.37025	0.158816	-1.21144	2.33134e-28	8.76624e-28
CD34	0.98153	2.49893	1.5174	5.49895e-65	5.23923e-63
HGFAC	6.39655	3.23438	-3.16217	2.79189e-41	2.33441e-40
AC011603.2	2.92207	0.0695419	-2.85252	7.8408e-31	3.40998e-30
SCAF1	3.04536	4.14379	1.09843	5.30557e-62	3.17975e-60
ARL6IP4	4.58183	0.995151	-3.58668	8.31462e-36	4.79594e-35
PLGLA	3.69007	1.25156	-2.4385	1.18894e-61	6.73453e-60
APOA4	4.40735	3.10797	-1.29937	4.3037e-12	7.54539e-12
HIBCH	3.97289	2.8768	-1.09609	5.95354e-45	6.51418e-44
SHLD2P1	1.31759	0.194222	-1.12336	2.11262e-53	4.8101e-52
ARGLU1	4.26196	3.21689	-1.04507	2.03869e-26	6.94286e-26
SEC14L2	5.10956	3.98347	-1.12608	1.75622e-14	3.41448e-14
H2AFX	2.40536	4.0302	1.62484	4.86287e-57	1.5604e-55
RPS27L	4.92227	3.25333	-1.66894	2.22091e-42	2.02464e-41
LSM3	2.39735	3.54885	1.1515	1.88293e-41	1.59448e-40
ZGPAT	3.68518	2.07389	-1.61129	4.28625e-46	5.12117e-45
EXOSC4	3.36304	4.57008	1.20704	3.6169e-45	4.01664e-44
GARS-DT	2.48177	0.615635	-1.86613	1.43612e-15	2.92561e-15
MRPS21	4.08444	5.57706	1.49262	2.99592e-65	3.00871e-63
EDEM2	3.5827	4.64271	1.06001	1.16084e-53	2.70945e-52
EIF2S3	4.20411	5.22469	1.02059	4.69108e-45	5.16019e-44
RPL22P1	3.75911	1.36732	-2.39179	3.54423e-37	2.23595e-36
GLYAT	5.69528	3.38813	-2.30715	1.88951e-33	9.53988e-33
AC104809.1	2.0271	0.567055	-1.46004	2.47073e-39	1.80368e-38
ENPP2	1.70763	2.88886	1.18123	1.45557e-22	4.04715e-22
PPP1R12C	4.1535	3.103	-1.0505	2.20037e-22	6.06178e-22
FAM47E-STBD1	2.5272	0.0210902	-2.50611	1.22694e-41	1.05632e-40
COQ6	2.88923	1.59391	-1.29533	9.15809e-54	2.15924e-52
LY96	1.87809	3.12066	1.24257	2.76758e-20	6.92511e-20
CDK10	4.7934	3.26853	-1.52487	1.38067e-35	7.87592e-35
DHODH	4.86394	2.78908	-2.07487	4.63068e-57	1.49105e-55
IRF2BP1	2.88106	3.95013	1.06906	4.43641e-43	4.25305e-42
RPS4X	6.91488	8.04803	1.13315	4.99358e-46	5.91305e-45
LINC02542	0.886534	2.04934	1.1628	5.91007e-31	2.58543e-30
HLTF	1.67814	2.73977	1.06163	6.38087e-48	8.83392e-47
FXYD2	2.12374	1.09113	-1.0326	1.622e-23	4.73426e-23
CDRT4	1.06891	0.0544457	-1.01447	4.9757e-41	4.09223e-40
PPT1	2.68922	4.17381	1.48459	8.43658e-42	7.33817e-41
RAB43	2.59904	0.938518	-1.66052	1.46389e-47	1.96231e-46
AC016596.2	0.905314	2.73208	1.82676	3.64769e-32	1.70922e-31
TSPAN15	1.40098	2.48663	1.08565	6.80535e-34	3.53175e-33
HBA1	4.72943	0.219475	-4.50996	1.19913e-61	6.75108e-60
BLOC1S5-TXNDC5	2.05909	0.0989363	-1.96016	2.60911e-58	9.59893e-57
ALPL	4.78726	3.25166	-1.5356	3.10526e-29	1.22568e-28
PRKAG2	3.20943	2.05176	-1.15767	2.68279e-53	6.04165e-52
C1orf198	2.22746	3.44602	1.21856	1.57459e-43	1.55278e-42
ABCF1	3.44875	4.48281	1.03406	1.44354e-53	3.33993e-52
ENY2	4.52002	3.4882	-1.03182	1.5518e-26	5.32525e-26
ZNF276	2.56157	1.29774	-1.26383	1.11368e-30	4.78739e-30
GCSH	4.294	2.5463	-1.7477	7.58817e-60	3.36469e-58
ACOT2	4.71548	3.6902	-1.02528	1.70284e-33	8.62516e-33
ACSM3	4.31432	1.78127	-2.53304	5.49918e-61	2.87801e-59
ABCA6	3.63632	2.31836	-1.31796	7.15312e-33	3.49455e-32
MTMR3	1.6678	0.541606	-1.12619	8.9972e-26	2.95857e-25
H1F0	5.58355	7.2764	1.69285	4.49933e-55	1.18069e-53
CCN1	5.34589	4.00488	-1.34101	1.49116e-22	4.14301e-22
AFM	6.50596	5.24075	-1.2652	3.9778e-14	7.61813e-14
TP53I3	2.20199	3.59022	1.38823	1.58806e-43	1.5644e-42
COL4A1	2.34884	4.585	2.23616	1.01286e-52	2.16299e-51
AC008264.2	1.29954	0.03208	-1.26746	9.74866e-40	7.3447e-39
ILF2	4.3566	5.87748	1.52088	9.86287e-69	1.85093e-66
CCDC152	3.29145	2.17973	-1.11172	3.53839e-25	1.13052e-24
WDR59	3.77254	2.4776	-1.29494	1.409e-49	2.25865e-48
PPP1R1A	4.77766	3.35321	-1.42444	9.7033e-18	2.17516e-17
TOMM5	3.71342	2.49335	-1.22006	1.26318e-27	4.57656e-27
RPL8	8.04601	9.39015	1.34413	4.57667e-49	7.01567e-48
DTL	0.271272	1.59033	1.31906	4.30101e-63	3.00408e-61
ILK	3.47081	1.60421	-1.8666	5.3602e-32	2.48657e-31
TIPRL	2.61299	3.90347	1.29047	1.19681e-59	5.18407e-58
ACAD11	3.54823	0.41238	-3.13585	1.46807e-67	2.23568e-65
ATP1B1	4.80258	6.61723	1.81465	2.48553e-47	3.24745e-46
HEMK1	2.33607	1.19344	-1.14263	2.40684e-31	1.07337e-30
IGSF3	0.278611	1.38618	1.10757	2.43131e-47	3.17884e-46
INMT	2.88808	1.43444	-1.45364	5.51865e-34	2.88089e-33
AK1	3.94361	2.27525	-1.66836	1.00706e-36	6.13045e-36
AC079922.1	0.741898	2.16547	1.42357	4.89383e-37	3.05725e-36
SMO	2.71218	3.89632	1.18414	4.97961e-31	2.18405e-30
STAG3L5P-PVRIG2P-PILRB	3.65224	0.75078	-2.90146	8.79874e-29	3.38245e-28
KIF5B	2.78013	3.84593	1.0658	9.52027e-42	8.24602e-41
UBE2C	0.69444	3.22785	2.53341	6.7285e-64	5.4589e-62
NDUFA4L2	1.83745	2.99941	1.16196	1.32794e-36	8.04163e-36
XRN2	3.16452	4.1852	1.02069	1.96643e-36	1.17819e-35
SLC25A47	7.07386	3.9682	-3.10567	3.33163e-33	1.65681e-32
CDCA5	0.419595	1.94029	1.52069	8.23552e-64	6.62371e-62
NOTCH2NLA	1.49819	0.0429732	-1.45522	1.29906e-41	1.11479e-40
PLA2G2A	6.42818	4.45435	-1.97383	2.03905e-10	3.33775e-10
PGA4	1.14706	0.000125695	-1.14693	3.47328e-63	2.46298e-61
MIR135A1	1.46723	3.83504	2.3678	1.07956e-23	3.18368e-23
RBM42	4.04068	5.33019	1.28951	1.43255e-63	1.09079e-61
CENPW	0.929656	2.88821	1.95855	1.10095e-66	1.48221e-64
AL121845.2	3.40796	0.387812	-3.02014	2.73945e-40	2.1394e-39
NDUFA1	5.71595	7.45145	1.73549	4.25802e-66	5.137e-64
MARCKSL1	3.50812	5.10353	1.59541	3.9809e-35	2.21374e-34
CLASRP	4.26598	2.84257	-1.42341	8.38119e-18	1.88383e-17
RHEBP2	2.348	1.22807	-1.11993	3.27401e-26	1.10056e-25
AP002893.1	1.08676	0	-1.08676	4.98941e-62	2.99994e-60
AC136475.3	2.66202	1.63318	-1.02884	1.21616e-17	2.71672e-17
UBALD2	3.29192	4.4511	1.15918	1.19793e-35	6.85444e-35
MRPL14	4.68088	6.26212	1.58124	3.26241e-54	8.06014e-53
DAG1	3.439	4.49923	1.06024	7.40125e-41	5.9786e-40
FAM180A	1.90227	0.514056	-1.38821	7.78967e-54	1.85306e-52
CLEC4M	3.53463	0.133392	-3.40123	2.25434e-74	2.09417e-70
GLYATL1	5.89233	3.34908	-2.54325	2.07001e-56	6.27387e-55
ABHD12	3.21019	4.49806	1.28787	2.74615e-61	1.47886e-59
AC012313.10	2.36996	1.23245	-1.13751	5.78681e-24	1.73129e-23
RGCC	1.79485	3.46404	1.6692	7.5885e-38	5.0209e-37
KPNA2	2.41991	4.22873	1.80882	1.04198e-57	3.57175e-56
PDGFRB	2.23223	3.23917	1.00694	4.55908e-30	1.88901e-29
AC018738.1	1.49911	4.51918	3.02008	4.61973e-40	3.55551e-39
RF02101	2.68509	0	-2.68509	1.66889e-69	3.56395e-67
ICAM3	2.96226	0.30283	-2.65943	3.18388e-55	8.47468e-54
COLEC10	3.28272	0.78518	-2.49754	1.63731e-60	7.98471e-59
VNN3	3.13	1.94881	-1.18119	1.50275e-20	3.80738e-20
LPA	2.94783	1.86038	-1.08745	7.41194e-19	1.74224e-18
GINS1	0.330928	1.55474	1.22381	5.87631e-62	3.48805e-60
PEG10	0.826969	2.4954	1.66843	0.000244552	0.000305509
C2CD4D-AS1	0.911661	2.32161	1.40995	1.64944e-50	2.87745e-49
SPINK1	4.09622	5.25064	1.15442	0.000639142	0.000783906
ITGAV	2.00228	3.03011	1.02784	1.12261e-28	4.29067e-28
USP5	3.48114	4.50872	1.02757	1.04581e-53	2.4564e-52
PRKCD	1.69223	2.75239	1.06016	3.82412e-47	4.92365e-46
HNRNPA0	2.57227	3.74332	1.17105	5.36735e-43	5.106e-42
RNF113A	2.50845	3.53425	1.02579	5.03736e-43	4.80684e-42
DBH-AS1	3.80581	2.75959	-1.04622	6.98948e-17	1.50822e-16
AC005912.1	2.48192	4.55152	2.0696	1.10408e-38	7.72024e-38
S100A10	5.13504	6.35271	1.21768	1.46855e-30	6.25642e-30
FAM220A	1.51191	2.63889	1.12698	3.67641e-68	6.50515e-66
CNKSR3	2.40504	1.36171	-1.04333	9.07762e-49	1.35792e-47
MTATP6P1	10.7582	9.69664	-1.06152	2.8708e-28	1.0736e-27
DNAJC17	2.9906	1.93965	-1.05095	3.87166e-41	3.21266e-40
CFP	2.56833	0.81732	-1.75101	7.09669e-58	2.47372e-56
MELK	0.241381	1.58193	1.34055	9.51903e-64	7.49382e-62
SIK1B	3.1223	1.79332	-1.32898	1.79547e-24	5.51554e-24
STAG3L3	1.75932	0.339185	-1.42014	5.28031e-27	1.85871e-26
ERGIC1	5.24751	4.13207	-1.11544	1.06653e-47	1.44424e-46
CHRD	4.74977	2.57555	-2.17422	1.5019e-34	8.09979e-34
IQGAP3	0.280927	1.72812	1.44719	3.21596e-62	1.97846e-60
GSTM1	3.90186	2.05569	-1.84617	7.38472e-12	1.28297e-11
ADIRF	2.76122	7.02897e-06	-2.76121	3.75628e-71	1.63928e-68
WDR73	1.71698	0.34276	-1.37422	1.55195e-31	7.01207e-31
TIGD5	0.740387	1.80958	1.06919	1.90378e-64	1.67632e-62
AC023024.1	2.03868	0.832174	-1.2065	1.07061e-37	6.99643e-37
BMS1P8	0.133286	1.15787	1.02458	5.59313e-15	1.11115e-14
ABCC3	5.28384	4.02964	-1.2542	1.28668e-31	5.84336e-31
FOXM1	0.720762	1.95581	1.23504	5.79209e-43	5.49879e-42
ACTR3C	2.06072	0.898481	-1.16224	2.1383e-53	4.86262e-52
CLEC1B	2.27821	0.145701	-2.13251	4.42699e-69	9.03835e-67
NDUFS6	4.64859	5.96947	1.32088	3.2827e-59	1.33772e-57
NELFE	3.35425	4.73777	1.38353	3.45026e-61	1.84207e-59
SDS	7.34689	5.01108	-2.33582	1.25631e-14	2.45973e-14
SNRPGP10	1.8881	0.772868	-1.11524	9.44245e-25	2.93953e-24
GREM2	2.70119	1.5742	-1.12699	1.08447e-18	2.5277e-18
TYMS	1.65061	2.98206	1.33145	9.29493e-43	8.6692e-42
N4BP2L2	3.39	1.72867	-1.66133	1.23909e-37	8.0634e-37
DERL2	4.1267	2.78856	-1.33814	1.66347e-40	1.31178e-39
ACADS	5.96705	4.91413	-1.05292	4.28413e-33	2.11576e-32
CFHR3	6.08054	3.63201	-2.44853	1.07032e-31	4.88229e-31
IFITM10	2.59972	1.55771	-1.04201	5.12693e-25	1.62299e-24
ELF3	4.70267	3.50038	-1.20229	3.40684e-17	7.4483e-17
AP001048.1	1.04157	0.0372954	-1.00427	1.28438e-32	6.19321e-32
HERC2P2	2.62617	1.45972	-1.16646	7.19157e-17	1.55093e-16
PDLIM2	3.20851	1.23418	-1.97433	2.532e-61	1.3755e-59
TCIM	5.40268	3.90219	-1.50049	4.54194e-28	1.6793e-27
CA5A	3.35285	1.53602	-1.81684	3.22134e-49	5.01671e-48
VAMP7	3.15852	4.2684	1.10988	5.07702e-36	2.96529e-35
THEM5	0.460945	2.08347	1.62253	2.21278e-62	1.3936e-60
PAH	7.57672	6.24916	-1.32756	1.04074e-25	3.41384e-25
HMMR	0.332548	1.59731	1.26476	2.34647e-61	1.27845e-59
SLC17A9	5.15457	3.77154	-1.38304	5.38016e-21	1.39062e-20
SORD2P	3.37506	1.91022	-1.46483	4.14161e-32	1.93529e-31
HSPB1P1	0.663133	2.38107	1.71794	1.9417e-47	2.56395e-46
TOMM22	3.69448	5.0429	1.34843	1.29881e-52	2.7364e-51
PROZ	4.552	3.20708	-1.34492	1.0151e-21	2.71478e-21
ANK3	1.46966	0.330842	-1.13882	2.09838e-61	1.15002e-59
AS3MT	2.37792	0.959544	-1.41838	1.77708e-38	1.22328e-37
TROAP	0.39369	1.56594	1.17225	6.43142e-50	1.07165e-48
NDUFA10	4.90128	3.53092	-1.37036	2.24742e-46	2.73623e-45
CPS1	7.33617	5.86928	-1.46689	1.13146e-06	1.57711e-06
CNOT1	4.19347	2.94023	-1.25324	1.92484e-38	1.32254e-37
ECT2	0.643082	1.64774	1.00466	1.57906e-47	2.10454e-46
PWWP2B	1.45353	2.55519	1.10166	2.04474e-39	1.50155e-38
ZIC2	0.0398389	1.21512	1.17528	2.17682e-52	4.50369e-51
RNA5-8SN2	5.02478	0.00263007	-5.02215	1.72657e-68	3.1449e-66
LINC02365	0.124303	1.16224	1.03793	3.96751e-25	1.26393e-24
AGAP6	2.46909	1.20412	-1.26496	8.44626e-22	2.26997e-21
HAND2-AS1	1.26569	0.107537	-1.15816	6.59573e-71	2.14986e-68
ATP6AP1	3.93356	4.95097	1.01741	2.57336e-65	2.64146e-63
PGAM1	4.83896	3.37892	-1.46003	1.92067e-47	2.53799e-46
PODXL	1.17931	2.64542	1.46611	5.20335e-54	1.26041e-52
WDR13	4.89404	3.85401	-1.04004	5.27163e-21	1.36314e-20
KDELR1	5.23613	6.40681	1.17068	3.20467e-58	1.16744e-56
CU633904.1	1.15032	0.00152181	-1.1488	1.34202e-52	2.82371e-51
AFDN	3.95402	2.8187	-1.13532	5.85129e-41	4.77012e-40
C4A	8.00799	4.47917	-3.52882	5.77485e-49	8.77277e-48
HSPA1B	5.47025	4.383	-1.08725	8.54924e-06	1.14493e-05
STEAP3	5.53744	4.18407	-1.35337	2.21657e-33	1.11482e-32
CNPY3	4.32482	5.37379	1.04897	3.39247e-30	1.41701e-29
SHMT1	6.30749	4.72563	-1.58186	1.25666e-44	1.34335e-43
PLVAP	1.7798	5.39508	3.61529	6.9559e-73	3.85422e-69
ABCA8	3.15811	1.38865	-1.76946	1.68002e-50	2.92806e-49
MTO1	2.81557	1.57271	-1.24286	2.87977e-53	6.43067e-52
ZNF207	3.77306	2.61567	-1.15739	4.47478e-16	9.30777e-16
HGF	2.36222	0.711369	-1.65086	4.29083e-58	1.54495e-56
H2AFY2	1.50044	2.66857	1.16813	8.51649e-18	1.91328e-17
CPT1B	2.58661	0.4737	-2.11291	2.5599e-23	7.40239e-23
HIGD2A	5.54279	6.74115	1.19836	1.59117e-56	4.86415e-55
ASL	6.62854	5.47326	-1.15528	3.05938e-35	1.71496e-34
CDA	4.59032	3.56103	-1.02929	4.97343e-11	8.33872e-11
GATD3B	4.31158	0.874908	-3.43667	5.77376e-46	6.80651e-45
KCNN2	1.96659	0.385161	-1.58142	1.59492e-54	4.00974e-53
RNU1-28P	1.44207	0.0078496	-1.43422	1.91188e-62	1.22486e-60
TSPOAP1	1.79218	0.587041	-1.20514	7.31508e-35	4.01379e-34
AC026464.6	1.48424	0	-1.48424	4.94106e-71	1.63928e-68
PPDPF	5.55121	6.64766	1.09645	2.59866e-26	8.79908e-26
PPM1G	3.64234	4.66288	1.02053	1.63743e-60	7.98471e-59
FAM99B	2.19831	1.02571	-1.1726	2.34767e-28	8.82406e-28
SLC43A3	5.2481	4.05491	-1.19319	1.99365e-27	7.15886e-27
SH3YL1	1.90953	0.853891	-1.05564	6.38529e-46	7.50363e-45
NAT8B	0.633435	1.81914	1.18571	1.98409e-25	6.41756e-25
PSMC6	4.08778	3.03857	-1.04921	1.04205e-29	4.22534e-29
AC091057.3	1.24674	0.0630035	-1.18373	9.03762e-35	4.93708e-34
SLC35B2	3.51443	4.95671	1.44227	1.81443e-58	6.82395e-57
MAGEC2	0.0100017	1.07436	1.06436	5.20107e-23	1.48161e-22
RNU1-2	1.45753	0.0169754	-1.44055	2.78388e-53	6.23154e-52
NDUFB7	6.49207	7.65703	1.16495	1.31218e-53	3.0495e-52
DMD	2.46128	1.39672	-1.06456	5.19777e-46	6.13919e-45
AC093752.1	1.90451	0.809752	-1.09475	1.37526e-36	8.30928e-36
FAM133B	2.0404	1.02211	-1.01829	8.18966e-43	7.68136e-42
NABP1	1.91341	0.782849	-1.13056	1.08869e-36	6.60806e-36
ATP6V1F	4.68801	6.31344	1.62543	1.15235e-65	1.25202e-63
AL162413.1	0.00753018	1.13912	1.13159	6.02315e-26	1.99686e-25
SH3BGRL3	4.58462	5.59982	1.0152	1.84356e-28	6.96453e-28
RBM34	2.48413	0.600621	-1.88351	4.95028e-24	1.48532e-23
BHMT	6.50907	5.14957	-1.35951	4.05642e-10	6.54601e-10
GTF2H5	1.36707	2.42273	1.05566	9.99239e-37	6.08684e-36
PSMD9	3.11814	1.65248	-1.46565	5.5677e-33	2.73802e-32
GOLGA6L5P	1.34628	0.0861507	-1.26013	9.31962e-37	5.69195e-36
TMEM25	2.51658	1.11812	-1.39847	1.81174e-46	2.22326e-45
UBE2R2	3.44184	4.44249	1.00065	5.05962e-35	2.79853e-34
RNA5-8SN1	5.0266	0.00147486	-5.02513	1.63254e-70	4.9723e-68
ERICH1	1.98321	0.878071	-1.10514	1.40631e-47	1.88649e-46
PLA2G4B	1.5579	0.0636802	-1.49422	1.42983e-31	6.47131e-31
ATRN	3.10731	4.50838	1.40107	5.14527e-38	3.44607e-37
SPG7	4.17408	2.56082	-1.61326	5.64387e-52	1.12871e-50
AC026401.3	0.876319	1.95113	1.07481	9.7338e-52	1.90362e-50
UGP2	6.34631	5.23916	-1.10715	1.3093e-37	8.50842e-37
LINC01018	3.62817	2.56666	-1.06151	3.25814e-08	4.85701e-08
AL049839.2	7.30614	1.67514	-5.631	1.48065e-58	5.60264e-57
KANK1	4.22416	3.02513	-1.19903	6.49215e-43	6.13831e-42
CDKN3	0.547665	2.32609	1.77842	8.18084e-60	3.59319e-58
BAIAP2L2	0.890609	2.2156	1.32499	1.25489e-32	6.05575e-32
ARF6	3.56843	4.59607	1.02764	3.91162e-26	1.31039e-25
AL121845.3	2.23211	0.389993	-1.84212	1.51701e-47	2.02475e-46
CHAF1A	1.09794	2.31828	1.22034	1.58887e-63	1.19998e-61
SLC27A5	7.31359	4.84853	-2.46506	8.7458e-45	9.4635e-44
THAP8	1.42584	2.44732	1.02149	2.28418e-55	6.23169e-54
MTG1	3.44741	1.59857	-1.84884	7.4717e-24	2.2232e-23
IRF6	2.96237	4.02734	1.06497	9.50565e-25	2.95821e-24
CENPU	0.83069	1.99892	1.16823	3.19336e-51	6.005e-50
TMX4	2.52246	3.58566	1.0632	2.69005e-31	1.19709e-30
BCO2	4.04062	0.75109	-3.28953	8.67752e-70	2.22022e-67
LENG8	4.49945	3.4614	-1.03804	2.49371e-17	5.48811e-17
RPL18A	7.14276	6.04202	-1.10074	1.55409e-19	3.75858e-19
MT2P1	3.59516	1.78792	-1.80724	2.06366e-29	8.22233e-29
TTC7B	2.11962	0.674864	-1.44475	8.64218e-58	2.99e-56
CRYAA2	1.76308	0.0271553	-1.73593	1.69114e-41	1.43797e-40
TOR3A	2.67662	3.74709	1.07047	3.25343e-39	2.35931e-38
PTTG1	0.78238	2.89344	2.11106	1.24593e-59	5.37079e-58
DHRS1	4.93389	3.55253	-1.38136	4.24824e-32	1.98362e-31
RBM39	5.42913	3.95886	-1.47027	2.75638e-21	7.20796e-21
CBWD2	2.30059	0.792365	-1.50822	1.55769e-37	1.00732e-36
ADAMTSL2	3.34524	2.05284	-1.2924	2.39441e-26	8.12376e-26
P3H4	1.02048	2.05466	1.03418	7.75056e-49	1.16786e-47
ARPIN-AP3S2	1.71553	0.0691846	-1.64635	5.56432e-41	4.54815e-40
AC234031.1	2.01109	0.00175186	-2.00934	2.7134e-42	2.45793e-41
AL358781.1	1.13087	0	-1.13087	1.44639e-60	7.16599e-59
POMP	4.75134	5.87792	1.12658	3.82743e-44	3.94179e-43
PDGFB	1.0413	2.31237	1.27107	1.38075e-52	2.89863e-51
AC127502.2	2.4942	1.07017	-1.42403	2.81078e-44	2.93217e-43
GAK	4.00881	2.66133	-1.34748	3.46627e-26	1.1633e-25
TCF19	0.643332	2.43447	1.79113	1.12361e-63	8.66207e-62
C1R	8.6225	7.29377	-1.32872	1.54937e-40	1.22493e-39
DPH1	3.36988	1.71116	-1.65872	3.62375e-54	8.89696e-53
MTERF4	2.56893	1.48378	-1.08515	2.24115e-43	2.18804e-42
PCSK7	2.27173	0.66449	-1.60724	6.29119e-34	3.27314e-33
TPD52L1	3.65541	1.92099	-1.73442	6.86408e-60	3.07296e-58
FHL1	2.89765	1.82839	-1.06925	1.00289e-38	7.02324e-38
BOLA2B	2.50037	0.484233	-2.01614	3.8091e-20	9.47126e-20
MAGEA6	0.0112156	1.05573	1.04451	4.24884e-18	9.6762e-18
RNU1-3	1.43714	0.00138103	-1.43576	5.0292e-66	5.91376e-64
OLFML2B	0.421478	1.74293	1.32145	1.85749e-61	1.03016e-59
NPM3	2.43488	3.75291	1.31803	9.35903e-41	7.51432e-40
SQLE	2.82219	4.21702	1.39483	2.19699e-27	7.88142e-27
SNX29P2	1.56756	0.0118663	-1.5557	4.32969e-47	5.55918e-46
TFPT	2.21433	3.40537	1.19104	1.06233e-49	1.72076e-48
DGCR2	3.19479	4.24388	1.04908	2.29271e-54	5.72531e-53
FNDC4	5.21929	4.17806	-1.04122	6.21436e-18	1.40492e-17
SUCO	1.49723	2.52035	1.02312	3.55593e-59	1.44564e-57
IGFLR1	3.08282	1.0135	-2.06932	7.01448e-50	1.15945e-48
KBTBD11	1.68954	0.689012	-1.00053	1.83096e-37	1.17952e-36
NBPF1	1.77749	0.756839	-1.02066	4.96477e-38	3.32878e-37
LMO7	3.60805	2.25209	-1.35597	1.27474e-51	2.47217e-50
CYP2C19	2.34356	0.290108	-2.05345	4.44845e-60	2.04069e-58
RPL36A	5.91136	3.65509	-2.25627	3.60861e-24	1.0895e-23
PRSS8	2.99008	1.84711	-1.14297	3.46643e-15	6.95795e-15
ST5	2.97755	1.70975	-1.26781	1.75153e-29	7.00274e-29
TMEM82	3.87211	2.64202	-1.23009	1.45765e-15	2.96785e-15
PRODH2	5.55747	4.39391	-1.16356	4.6263e-23	1.32017e-22
MAN2C1	4.6956	2.69043	-2.00517	2.5052e-32	1.18553e-31
CPQ	3.30786	4.7158	1.40794	1.05747e-49	1.71437e-48
TMEM106C	3.02133	4.23525	1.21391	1.66061e-48	2.4198e-47
XBP1	4.70894	0	-4.70894	4.94e-71	1.63928e-68
MTHFS	5.6146	3.58426	-2.03034	1.33178e-53	3.08903e-52
NIPAL2	1.53854	2.60345	1.06492	2.11698e-36	1.26305e-35
ERICH5	1.99024	3.74254	1.7523	4.45177e-22	1.2108e-21
ARHGAP9	1.987	0.963262	-1.02373	1.42553e-41	1.2205e-40
STT3B	3.92509	4.94629	1.0212	9.43193e-47	1.18163e-45
SRSF5	6.11008	4.61438	-1.49571	8.26854e-51	1.47168e-49
C1QA	4.50432	6.01065	1.50633	1.08177e-12	1.94655e-12
AL583722.2	2.68956	0	-2.68956	4.94106e-71	1.63928e-68
C7	5.11071	2.61311	-2.4976	2.44299e-34	1.29941e-33
CAMTA1	3.66477	1.86563	-1.79914	3.49349e-45	3.88191e-44
U2AF1	2.59148	0.0661917	-2.52529	4.11267e-34	2.15784e-33
CLTRN	2.70825	1.48764	-1.22061	2.91006e-25	9.33781e-25
AC006449.7	1.34039	0	-1.34039	4.94106e-71	1.63928e-68
TIMP3	2.48629	0.719948	-1.76634	6.5263e-46	7.6548e-45
CHRNA4	3.09055	0.831089	-2.25946	2.86625e-41	2.39443e-40
SMS	3.24028	4.3797	1.13942	2.76282e-44	2.8871e-43
ADRA1A	3.27919	0.754775	-2.52442	1.23213e-63	9.45941e-62
AC006011.1	1.48665	0	-1.48665	4.94106e-71	1.63928e-68
GNS	3.33878	4.86547	1.52669	4.66548e-51	8.59153e-50
SLIRP	4.97506	3.82383	-1.15123	1.34427e-29	5.40708e-29
NUSAP1	1.33792	2.98448	1.64656	1.85669e-55	5.09533e-54
RNF20	2.00072	3.07247	1.07175	1.25601e-48	1.8594e-47
THY1	1.30916	3.09667	1.78751	8.52053e-55	2.19256e-53
UBL4A	3.08453	4.27139	1.18687	3.35007e-62	2.05416e-60
DPP4	2.43412	3.91161	1.47749	6.90853e-27	2.41448e-26
GRB14	4.53977	3.33412	-1.20564	3.32379e-31	1.47135e-30
GPD1	4.77868	3.54358	-1.2351	3.66484e-16	7.65476e-16
CCDC57	3.19643	1.47674	-1.71969	1.62973e-40	1.28572e-39
OLFML2A	0.27676	1.33608	1.05932	2.2477e-62	1.41081e-60
PHYHD1	4.27362	2.37396	-1.89966	5.24217e-42	4.63782e-41
MET	2.86423	4.10779	1.24356	1.83146e-31	8.22893e-31
TM2D3	3.39249	2.04763	-1.34486	2.39033e-48	3.42406e-47
PI4KAP1	1.98881	0.602444	-1.38637	2.36181e-24	7.20171e-24
MYH4	0.143669	1.18221	1.03854	3.29383e-13	6.05602e-13
SEC16B	2.63986	0.568799	-2.07106	1.21265e-40	9.65311e-40
PLSCR3	1.70738	0.122906	-1.58447	1.11403e-33	5.70182e-33
RBM6	4.15359	2.8237	-1.3299	5.92206e-21	1.52729e-20
MT1E	8.35752	4.67836	-3.67916	7.27289e-49	1.09946e-47
AC104958.2	1.82018	3.35553	1.53535	3.94445e-40	3.05477e-39
DBN1	1.18475	2.30541	1.12066	7.33381e-34	3.79752e-33
SLC25A37	3.04847	1.59395	-1.45451	1.24171e-56	3.87077e-55
AL591895.1	2.26304	3.27353	1.01049	6.728e-36	3.90501e-35
NT5C2	2.76311	1.61892	-1.14419	3.26876e-40	2.54528e-39
LAPTM4B	2.77723	4.8748	2.09757	6.08933e-47	7.73299e-46
PI4KAP2	1.85774	0.546484	-1.31125	1.20008e-26	4.14045e-26
U2AF1L4	3.05514	1.76093	-1.29421	3.35085e-25	1.07207e-24
PRPF6	3.52649	5.46992	1.94343	2.88585e-64	2.45946e-62
MFSD2A	5.50313	2.23901	-3.26411	3.20667e-49	4.99805e-48
CPE	2.24777	3.91666	1.66889	1.02689e-36	6.2471e-36
CCNB2	0.372591	2.03056	1.65797	1.36063e-63	1.0403e-61
PRAL	1.51655	0.0609877	-1.45557	1.87326e-41	1.58846e-40
MYCBP2	2.39778	1.22591	-1.17187	2.51047e-54	6.25227e-53
C17orf49	2.81649	0.584546	-2.23194	3.87823e-30	1.61519e-29
DKK1	0.171262	1.25384	1.08258	2.66609e-12	4.71476e-12
SEC31B	1.79018	0.662592	-1.12759	4.6353e-28	1.71313e-27
MT1H	6.79839	1.70221	-5.09618	3.32955e-57	1.08908e-55
SLX1B-SULT1A4	1.24723	0.00181112	-1.24542	1.6696e-47	2.22043e-46
ATAD2	1.33112	2.81389	1.48277	3.00632e-58	1.09733e-56
SLC25A18	4.64161	3.19024	-1.45137	4.96878e-29	1.94061e-28
ESR1	1.77795	0.551807	-1.22615	3.79572e-44	3.91129e-43
CDK1	0.436784	2.09054	1.65375	2.13549e-62	1.35411e-60
MEMO1	2.24527	0.56027	-1.685	2.11202e-49	3.3452e-48
APEX1	4.87179	5.93926	1.06748	9.15431e-62	5.26557e-60
AP1G2	3.07903	1.41393	-1.66511	5.72779e-30	2.36114e-29
EIF3L	5.39611	4.27682	-1.1193	3.41926e-33	1.69812e-32
FUCA2	3.58266	4.9087	1.32604	2.02515e-40	1.59025e-39
ASPG	5.07271	1.79221	-3.2805	8.89465e-64	7.03207e-62
TOMM34	2.72734	3.89378	1.16644	6.97215e-51	1.25519e-49
NPIPA1	3.27692	0.425	-2.85192	9.47571e-25	2.94939e-24
MPRIP	3.90539	2.206	-1.69939	6.36305e-30	2.61494e-29
AC104692.1	0.235651	1.46071	1.22506	3.38814e-27	1.20383e-26
GINS2	0.564876	1.75807	1.1932	2.98073e-54	7.39373e-53
HDAC6	4.75272	3.07753	-1.67519	1.07274e-56	3.36096e-55
PTP4A3	1.51574	2.95382	1.43808	5.12754e-41	4.2078e-40
RPAIN	2.64013	1.6269	-1.01323	2.07951e-48	3.00197e-47
TMEM38B	1.67294	2.71114	1.0382	4.92187e-48	6.88062e-47
CDCA8	0.426453	2.00166	1.57521	5.48815e-66	6.40648e-64
RAPH1	2.20029	0.52373	-1.67656	6.11634e-54	1.46438e-52
OIT3	3.4529	2.30247	-1.15044	1.24677e-13	2.33059e-13
DCK	1.13702	2.14235	1.00533	1.94387e-48	2.81271e-47
HSD17B4	6.49738	5.14144	-1.35594	1.4347e-40	1.13669e-39
AC133550.1	1.9292	0.000875083	-1.92833	2.14751e-65	2.22897e-63
AC009963.2	3.53768	0.0508528	-3.48683	7.03128e-58	2.45553e-56
THRSP	5.33852	3.25812	-2.0804	1.72925e-15	3.51122e-15
DDOST	5.16828	6.19136	1.02309	7.83641e-48	1.07448e-46
FCF1P2	1.59288	2.63473	1.04186	8.79657e-53	1.89596e-51
LCN12	3.24254	1.90646	-1.33608	2.31589e-22	6.37436e-22
HMGCL	6.02893	4.58366	-1.44527	3.22309e-57	1.05611e-55
SEC24D	3.46711	2.46571	-1.0014	1.0219e-41	8.83883e-41
F11	5.4153	3.87119	-1.5441	8.69208e-40	6.57533e-39
NACA3P	0.710164	1.73239	1.02223	1.17506e-29	4.74082e-29
ATP1A1	5.01666	6.01729	1.00063	8.00055e-24	2.37675e-23
DHRS4L2	4.58566	3.45128	-1.13438	1.05796e-37	6.91866e-37
HLA-A	6.76149	8.74565	1.98416	9.1965e-52	1.80044e-50
DARS2	1.79179	3.25926	1.46747	1.84811e-60	8.91846e-59
NEAT1	6.81012	3.55489	-3.25523	6.00592e-29	2.33537e-28
ATF7IP2	3.1426	2.07231	-1.07029	2.34272e-30	9.87205e-30
NAIP	1.34393	0.0507692	-1.29316	3.17603e-49	4.95445e-48
PZP	2.53861	0.499562	-2.03905	2.64475e-46	3.19692e-45
ZC3H13	3.43403	2.23481	-1.19922	1.48988e-42	1.36896e-41
GJA5	0.5201	1.63152	1.11142	1.79585e-46	2.20523e-45
CBX4	2.62989	3.74928	1.11939	1.51698e-47	2.02475e-46
NDUFA5	3.82437	2.72469	-1.09968	7.89808e-50	1.29399e-48
NDUFB2	5.49231	4.33326	-1.15904	8.97914e-36	5.17151e-35
GPHN	3.53765	2.30086	-1.2368	4.17887e-47	5.36924e-46
TM9SF1	2.50791	1.48637	-1.02154	1.56557e-34	8.42363e-34
NPAS2	2.3551	1.33099	-1.02411	1.62396e-21	4.29488e-21
LINC01146	3.40452	2.18711	-1.2174	5.34981e-26	1.77775e-25
HLA-DRA	5.23995	7.47244	2.23249	6.61163e-30	2.71404e-29
LINC02193	1.33108	0.115829	-1.21525	3.36706e-37	2.1285e-36
PPIC	3.08735	4.14846	1.0611	3.58219e-42	3.20739e-41
CP	8.07136	6.13348	-1.93788	3.36734e-43	3.25334e-42
DTX1	3.13371	1.86349	-1.27023	3.47777e-26	1.16694e-25
FAM222A	0.991939	2.20075	1.20881	1.89327e-46	2.32025e-45
SCD	6.15383	7.72198	1.56815	2.33794e-18	5.37982e-18
AC098583.1	0.31916	1.33798	1.01882	1.81085e-47	2.3997e-46
MEA1	4.12468	6.0045	1.87983	1.10351e-70	3.47494e-68
LMNB1	1.45644	2.76161	1.30516	2.40903e-43	2.3507e-42
CCL25	0.167826	1.46964	1.30182	7.23902e-28	2.65693e-27
FTCD	7.54394	5.90223	-1.64171	3.23645e-27	1.15037e-26
SELENOW	5.0822	3.56509	-1.51711	7.45681e-37	4.59662e-36
WBP1	3.8694	2.2861	-1.58331	1.36409e-24	4.21617e-24
SPATC1L	0.427708	1.54808	1.12037	1.42983e-36	8.62496e-36
LARP1B	3.18575	1.96665	-1.21911	8.76352e-64	6.95801e-62
RPL34	7.63655	6.5141	-1.12246	1.58277e-29	6.34576e-29
RBM28	2.23911	1.18068	-1.05843	2.95087e-18	6.75674e-18
SKAP1	3.07795	1.68369	-1.39426	4.71864e-37	2.95575e-36
LANCL1	2.09599	3.21093	1.11494	1.17974e-49	1.90429e-48
HAL	5.29799	3.62257	-1.67541	6.69769e-18	1.51218e-17
GCHFR	5.50243	3.34981	-2.15261	7.62342e-57	2.40468e-55
ALG1L	0.460541	2.51485	2.05431	1.66323e-46	2.05323e-45
CHCHD2P2	0.627438	1.83869	1.21125	2.15168e-32	1.02345e-31
ACCS	3.03774	1.62933	-1.40841	2.86721e-32	1.35134e-31
FAM204A	2.32612	1.31468	-1.01144	7.82089e-39	5.51649e-38
SLC39A5	5.80286	4.31787	-1.48499	5.88952e-17	1.27501e-16
SERPINA3	7.01043	1.98252	-5.02791	1.11236e-52	2.35709e-51
RNASE6	1.50854	2.51728	1.00874	1.53772e-20	3.89547e-20
HRCT1	0.637568	2.57287	1.9353	1.71347e-49	2.7279e-48
CSTB	4.68653	5.83221	1.14568	1.9871e-38	1.36331e-37
SPARC	5.2146	6.32169	1.10709	4.70309e-25	1.49212e-24
EVL	4.60071	2.24185	-2.35886	1.45735e-48	2.13703e-47
AC135050.2	1.26547	0.0374918	-1.22798	1.49595e-59	6.41876e-58
AL365181.3	0.228582	1.8157	1.58712	8.26183e-44	8.3016e-43
KLHDC2	4.07767	2.885	-1.19266	7.46333e-43	7.0173e-42
PIGL	2.43354	1.0537	-1.37984	1.20471e-33	6.15235e-33
AC005339.1	1.96704	0	-1.96704	2.88097e-70	7.87141e-68
SAC3D1	1.98753	3.24728	1.25975	8.58216e-61	4.40464e-59
2022-09-04	3.42033	2.05954	-1.36079	3.46526e-32	1.62743e-31
RPL28	7.44184	6.34435	-1.09749	1.50293e-17	3.34527e-17
PHF11	3.1639	2.13827	-1.02563	3.28042e-36	1.93298e-35
TMEM45B	2.68902	4.03388	1.34487	3.22883e-20	8.05645e-20
CLIC1	4.89873	6.50016	1.60143	5.25313e-49	8.01956e-48
RAD21	3.40186	4.54009	1.13823	5.09383e-51	9.32397e-50
NDUFA7	3.65812	1.87642	-1.7817	2.12241e-31	9.48805e-31
LINC01151	0.379463	1.45733	1.07787	1.55401e-21	4.11339e-21
TIMM23	4.18359	5.33504	1.15145	7.25916e-42	6.3527e-41
RBM5	4.06084	2.44383	-1.61701	2.66992e-24	8.12388e-24
ATF6	2.36477	3.52563	1.16086	5.76343e-39	4.11367e-38
ASPDH	5.16533	3.89046	-1.27487	1.12409e-16	2.4005e-16
CCZ1B	2.65084	0.590347	-2.06049	9.38402e-34	4.83086e-33
NUMB	3.47044	2.45456	-1.01588	3.19279e-52	6.51141e-51
FOS	5.67978	3.66512	-2.01465	2.59321e-29	1.02903e-28
TMEM45A	4.16014	2.1094	-2.05073	4.24662e-45	4.6796e-44
AC093495.1	1.43221	0.255798	-1.17641	2.30236e-27	8.24986e-27
PEX6	3.07336	4.1874	1.11404	8.78597e-39	6.1691e-38
AC115618.2	1.35318	2.43063	1.07745	8.07604e-39	5.68584e-38
CYFIP2	3.16159	2.07389	-1.0877	7.52999e-27	2.62328e-26
SRP19	4.03702	2.77817	-1.25885	4.39788e-27	1.55516e-26
PAM16	3.78318	2.3336	-1.44957	2.15702e-28	8.12061e-28
TM4SF4	5.9803	7.63397	1.65367	3.26274e-34	1.72114e-33
NADK	5.12291	3.71753	-1.40538	5.45655e-54	1.3183e-52
CYP2A7	4.25303	2.18769	-2.06534	3.72816e-21	9.69426e-21
HIST2H2AA4	1.92812	0.0275278	-1.9006	1.27808e-37	8.31422e-37
ATXN3	1.64728	0.591529	-1.05575	2.98223e-49	4.66387e-48
LINC01348	3.10449	1.87135	-1.23314	1.40795e-22	3.91944e-22
C1QL1	0.371118	1.72726	1.35614	6.73813e-26	2.22793e-25
TMEM198B	2.91468	1.88099	-1.03369	3.23633e-26	1.08868e-25
MDK	1.87133	5.50815	3.63682	8.98581e-65	8.34737e-63
CAVIN1	2.98325	4.33345	1.3502	6.03819e-33	2.96312e-32
HLA-E	6.5761	7.70365	1.12755	1.9322e-32	9.22126e-32
NXT1	2.37604	3.43396	1.05792	7.83259e-38	5.17148e-37
RNU1-4	1.45479	0.00155989	-1.45323	8.73916e-67	1.18514e-64
MRPL57	3.41698	4.55988	1.1429	4.77193e-30	1.97544e-29
FOXRED2	1.49398	2.88181	1.38782	1.53137e-48	2.24026e-47
LIMD1-AS1	1.76738	0.0902179	-1.67717	2.46354e-33	1.23536e-32
NEU1	3.26116	4.69412	1.43296	8.22373e-63	5.4763e-61
DNASE2	3.38645	4.68463	1.29818	2.8135e-39	2.04747e-38
AC092171.2	0.595674	1.91203	1.31636	1.12359e-63	8.66207e-62
CNPY2	4.80864	3.79669	-1.01195	8.74786e-23	2.46066e-22
AC015674.1	1.56039	0	-1.56039	1.66887e-69	3.56395e-67
ITGA6	1.69821	3.36486	1.66664	3.72313e-63	2.63011e-61
FAM13A	2.9529	1.10167	-1.85123	1.23276e-58	4.73437e-57
NPEPL1	2.50338	1.24171	-1.26166	6.39754e-16	1.32184e-15
AGT	8.66583	10.1636	1.49773	4.28064e-38	2.88152e-37
CYP4V2	4.29694	3.11945	-1.17748	3.55808e-36	2.09328e-35
TPPP2	1.63062	0.56673	-1.06389	7.18013e-40	5.46496e-39
OXT	2.27576	0.814151	-1.46161	9.8654e-35	5.38136e-34
SDHAP1	2.58146	1.38843	-1.19302	1.98395e-21	5.21872e-21
TVP23B	2.89268	1.73359	-1.1591	2.76907e-57	9.1542e-56
AC108449.3	1.07396	0	-1.07396	9.88114e-66	1.08628e-63
CCDC198	3.56482	1.9572	-1.60762	5.68007e-48	7.91673e-47
KIFC1	0.36495	2.2617	1.89675	1.41215e-66	1.87403e-64
ZFYVE21	3.02593	1.86498	-1.16095	2.89193e-55	7.73082e-54
AP002956.1	1.89173	2.99165	1.09992	1.68045e-38	1.15934e-37
FAM177A1	3.76071	2.65529	-1.10541	6.30224e-41	5.12202e-40
AC099518.5	1.44768	0	-1.44768	4.941e-71	1.63928e-68
RHOA	5.6888	6.99706	1.30826	6.01942e-61	3.13263e-59
IGF2BP2	0.705852	1.74302	1.03717	2.30839e-15	4.66321e-15
ATP6V1C1	2.54747	3.74369	1.19622	4.08387e-58	1.47615e-56
SKA3	0.156942	1.19577	1.03883	3.06377e-65	3.06031e-63
AC008581.1	2.10099	0	-2.10099	4.94106e-71	1.63928e-68
ACBD3	2.67122	3.80793	1.13671	6.65256e-47	8.39659e-46
NUF2	0.197802	1.41828	1.22048	7.26074e-64	5.8651e-62
G6PD	1.62793	3.12424	1.49631	3.64754e-50	6.20582e-49
VASH1-AS1	1.90182	0.627221	-1.2746	4.07048e-38	2.74403e-37
C1GALT1C1	2.93098	3.94006	1.00908	2.09205e-31	9.35456e-31
TRPV1	1.17851	0.0558311	-1.12268	5.10518e-42	4.52309e-41
TMEM97	3.7616	4.9647	1.2031	2.27742e-30	9.60548e-30
CCL2	3.66367	2.4953	-1.16837	8.93331e-19	2.09243e-18
AL590666.2	0.18841	1.47221	1.2838	9.54005e-44	9.52928e-43
SSX1	0.0109265	1.44387	1.43295	3.72934e-29	1.46671e-28
MYH9	5.13701	6.35483	1.21782	2.76205e-42	2.49713e-41
LYVE1	2.46963	0.943374	-1.52625	5.07938e-35	2.80863e-34
MFAP3L	2.50441	1.37224	-1.13217	1.55945e-28	5.9177e-28
GPR146	2.06465	0.615515	-1.44914	5.30682e-61	2.78528e-59
RNF26	2.94837	3.96276	1.01438	4.93133e-46	5.85052e-45
LIME1	3.86968	1.17878	-2.69089	1.57364e-42	1.44236e-41
TUBB4B	5.33127	6.50567	1.1744	2.66377e-40	2.08117e-39
DNAJC5	2.5492	3.63226	1.08306	9.39647e-58	3.22693e-56
SRSF10	3.57983	2.57791	-1.00192	5.45966e-45	5.98084e-44
NSDHL	3.45753	4.5021	1.04457	2.37806e-35	1.33966e-34
COL27A1	3.27581	2.21305	-1.06276	3.72438e-25	1.1877e-24
CMC1	3.13812	1.65074	-1.48738	7.86014e-31	3.41759e-30
MUC13	0.661044	3.14317	2.48213	3.12861e-30	1.30827e-29
AC008735.2	2.24494	1.22872	-1.01621	4.52466e-19	1.0732e-18
DPT	2.63154	1.2894	-1.34214	1.4905e-26	5.11867e-26
AL132712.2	0.437265	1.4429	1.00564	6.52194e-35	3.59026e-34
HEPN1	1.32973	0	-1.32973	1.66887e-69	3.56395e-67
FAM99A	4.84965	1.7209	-3.12875	1.37742e-48	2.02782e-47
UFC1	4.32427	5.41477	1.0905	1.63727e-60	7.98471e-59
SDHC	5.31313	3.47278	-1.84035	3.03656e-35	1.70288e-34
PTGR1	6.68396	5.67448	-1.00948	8.1209e-17	1.74628e-16
CRP	9.74636	7.18998	-2.55638	1.45074e-13	2.70533e-13
RDH5	3.70923	1.60375	-2.10547	6.24292e-58	2.19673e-56
ABCB6	2.874	1.71173	-1.16228	1.43132e-29	5.75099e-29
MDN1	2.98546	1.47481	-1.51065	1.89081e-53	4.34231e-52
HDAC11	1.31635	2.39162	1.07528	2.92438e-54	7.26366e-53
AL157935.2	1.78973	0.475537	-1.31419	5.27241e-31	2.31029e-30
SNCG	1.23674	2.78334	1.5466	3.75908e-37	2.36906e-36
TOMM6	3.95572	0	-3.95572	4.94075e-71	1.63928e-68
MAPRE1	2.70999	4.20728	1.49729	7.52858e-44	7.57711e-43
SF3B1	5.33837	4.30224	-1.03613	1.2146e-28	4.63465e-28
PTPN3	3.63111	2.40502	-1.22609	2.20766e-61	1.20636e-59
KCNMA1	1.79146	0.48173	-1.30973	3.82253e-53	8.43454e-52
MT1M	6.0226	1.95869	-4.06392	3.05257e-54	7.56184e-53
AQP7	2.82695	1.50973	-1.31722	8.87966e-53	1.91165e-51
CXCL10	1.55858	3.80741	2.24882	2.06831e-36	1.23597e-35
MANEAL	1.62201	2.68569	1.06367	1.52478e-34	8.2184e-34
MDM2	3.84389	2.75372	-1.09017	1.73215e-39	1.27959e-38
NOMO2	3.36906	0.99146	-2.3776	7.17114e-34	3.71432e-33
GIMAP5	1.38262	0.294059	-1.08856	1.38068e-48	2.031e-47
CETN2	2.93929	4.12327	1.18398	8.47939e-55	2.185e-53
LAMC1	2.34933	4.09747	1.74814	2.5586e-59	1.06823e-57
C4B	8.16569	4.78741	-3.37828	7.23603e-50	1.19077e-48
GNAO1	2.3828	0.730566	-1.65223	1.11264e-52	2.35709e-51
GDF15	3.526	4.82274	1.29673	8.30008e-13	1.50139e-12
UGT2B11	0.912346	2.58625	1.67391	2.19068e-30	9.24806e-30
AC096772.1	1.16378	0	-1.16378	9.60504e-69	1.82094e-66
UBE2T	0.792357	3.0752	2.28284	3.57933e-68	6.39427e-66
DIO3OS	1.90247	0.41097	-1.4915	9.86558e-50	1.60221e-48
ATP5MC3	6.14312	5.07647	-1.06664	2.52048e-36	1.49658e-35
TNS2	5.07938	3.35417	-1.72521	2.56855e-51	4.84477e-50
TRAPPC5	3.20054	0.210328	-2.99021	1.38209e-44	1.47235e-43
S100A11	4.86122	6.12252	1.26131	1.37614e-18	3.19391e-18
PINK1	4.55821	2.88376	-1.67445	1.66242e-60	8.08535e-59
ATP8B1	1.64401	2.71638	1.07238	1.79642e-39	1.32443e-38
IL1RL1	1.57284	0.167945	-1.4049	5.61322e-50	9.40378e-49
FABP1	9.78029	7.75314	-2.02715	3.75017e-29	1.47428e-28
JDP2	2.40262	1.37343	-1.02919	4.34528e-57	1.40892e-55
TBC1D3L	1.72541	0.256149	-1.46926	4.84804e-18	1.10072e-17
LAPTM5	3.39871	4.4374	1.03869	1.51425e-16	3.2145e-16
CRHBP	3.36944	0.754698	-2.61474	6.66683e-56	1.93234e-54
MIR621	2.12094	5.80172	3.68078	5.8765e-26	1.94894e-25
HOOK2	3.43033	2.03009	-1.40024	3.34767e-31	1.48157e-30
RABL2B	2.16807	1.12167	-1.0464	1.71131e-35	9.70523e-35
SPC25	0.276608	1.39244	1.11583	5.95938e-60	2.68085e-58
CLYBL	3.56948	2.37709	-1.19239	7.07215e-48	9.74728e-47
CEMP1	1.11336	0	-1.11336	4.941e-71	1.63928e-68
LUZP6	1.43817	0	-1.43817	1.44639e-60	7.16599e-59
HDAC10	2.88963	1.53709	-1.35254	6.3983e-26	2.11746e-25
C6	6.27825	4.95604	-1.32221	1.4254e-15	2.90489e-15
SOX12	1.22001	2.60637	1.38637	7.85764e-52	1.54484e-50
POC1A	1.31684	2.46674	1.1499	1.83113e-51	3.48572e-50
C9orf3	4.12949	2.1491	-1.98039	5.54581e-41	4.53506e-40
IGKV2-28	1.62352	0.132588	-1.49093	4.83196e-46	5.73629e-45
ALDH18A1	2.93939	4.00538	1.06599	3.05996e-35	1.71496e-34
PDGFRA	2.00381	0.861577	-1.14223	7.06633e-38	4.68207e-37
TMEM134	4.16546	2.6142	-1.55126	7.9889e-45	8.68494e-44
NGFR	2.81134	1.42271	-1.38863	2.29777e-35	1.29561e-34
S100A8	4.25253	1.56767	-2.68486	1.47294e-55	4.13383e-54
LINC00844	4.45882	2.71752	-1.7413	3.82083e-16	7.9725e-16
ASS1	8.71236	7.57009	-1.14227	7.82451e-29	3.01601e-28
HCP5	1.85126	2.90392	1.05266	2.67549e-29	1.05987e-28
LGALS3BP	5.22235	6.29959	1.07724	1.73277e-13	3.21867e-13
APOC4-APOC2	7.90124	3.30332	-4.59792	1.22014e-30	5.22445e-30
MAN1C1	2.9751	1.37651	-1.59859	1.21154e-53	2.82423e-52
AC025259.3	1.37797	0.216858	-1.16111	1.03675e-34	5.65192e-34
VAMP5	4.63813	6.01696	1.37882	1.74372e-44	1.8449e-43
ORM1	12.4356	10.8617	-1.5739	3.12176e-26	1.05204e-25
DGCR6	2.37726	1.12979	-1.24747	1.32083e-34	7.14817e-34
RPL26	7.57542	6.09531	-1.48011	4.28521e-38	2.88356e-37
SCLY	2.38104	0.573858	-1.80719	1.13315e-29	4.58367e-29
RASGEF1B	2.84365	1.38646	-1.45719	8.53745e-59	3.35343e-57
LGALS3	2.65297	4.08977	1.4368	1.49979e-24	4.62635e-24
AL445363.3	1.83958	0.0070735	-1.83251	5.51653e-54	1.33106e-52
MEG3	3.23078	0.837081	-2.3937	1.09102e-42	1.01299e-41
CDKN2B	0.503338	1.52161	1.01828	1.29905e-52	2.7364e-51
SLC46A3	4.10121	3.02255	-1.07866	1.22958e-14	2.40771e-14
CERS6-AS1	1.34347	0.0191225	-1.32435	5.83585e-39	4.16216e-38
RGS10	1.34197	2.48483	1.14286	2.07768e-34	1.11019e-33
NRM	1.5717	2.76485	1.19315	4.28377e-48	6.02941e-47
SFN	0.839962	3.39581	2.55585	1.44946e-38	1.00483e-37
KIF20A	0.273781	1.69306	1.41928	2.30492e-62	1.43702e-60
RUFY3	3.05281	1.50043	-1.55238	1.99025e-47	2.62433e-46
AC025423.2	1.57387	0	-1.57387	4.941e-71	1.63928e-68
AHSA2P	3.30992	1.84354	-1.46638	1.192e-15	2.43927e-15
MRNIP	2.76923	1.27054	-1.49869	3.98655e-20	9.90454e-20
AC092683.1	1.27623	0.0322204	-1.24401	2.13793e-28	8.0553e-28
NOA1	1.51823	2.60904	1.09081	4.65809e-56	1.36718e-54
GOLGA8N	1.35164	0.150408	-1.20123	5.88178e-40	4.49348e-39
NABP2	2.68863	3.80601	1.11739	1.83621e-63	1.34841e-61
C3P1	5.53074	3.42992	-2.10082	1.52162e-36	9.16091e-36
CYB5D1	1.53257	0.270426	-1.26214	3.71395e-55	9.85734e-54
FGFR1OP	2.35118	1.01917	-1.33201	3.21857e-59	1.31713e-57
SLX1A-SULT1A3	1.78462	0.0144658	-1.77016	5.83238e-33	2.86363e-32
MRPL45	3.39954	4.55205	1.15251	3.55232e-42	3.18219e-41
TRBV28	0.596069	1.64955	1.05348	1.29107e-30	5.51548e-30
CAP2	1.06545	3.03934	1.97389	2.75514e-65	2.81252e-63
CYP3A5	6.3261	4.72521	-1.60089	5.54458e-26	1.84028e-25
HPRT1	3.09165	4.17005	1.0784	1.58089e-28	5.99659e-28
C6orf62	4.08492	5.31237	1.22745	1.54957e-54	3.90631e-53
MIB2	3.4337	1.93303	-1.50067	1.44099e-36	8.68663e-36
TCEAL8	3.11449	4.2363	1.12182	1.40649e-20	3.56982e-20
PILRB	3.17795	0.731897	-2.44605	5.00687e-27	1.76513e-26
SEMA3F	1.30944	2.44436	1.13492	4.50279e-60	2.06052e-58
CARS2	3.3896	2.25314	-1.13646	2.15239e-38	1.47128e-37
SPTBN2	3.41405	1.86345	-1.5506	7.40116e-44	7.45695e-43
RRM1	2.14806	3.43609	1.28804	7.30893e-56	2.10531e-54
VBP1	2.84469	3.94984	1.10515	7.97808e-60	3.52078e-58
LRP11	1.8525	3.09774	1.24524	4.73463e-50	7.98227e-49
ANKHD1-EIF4EBP3	1.5195	0.433231	-1.08627	1.14109e-29	4.61279e-29
SLC44A3	1.21426	2.50245	1.28818	3.9659e-35	2.20606e-34
HBA2	6.33365	2.36735	-3.9663	6.20946e-57	1.96869e-55
PNISR	3.72064	2.10924	-1.61139	2.62945e-29	1.04274e-28
PSMB3	5.90194	7.02758	1.12564	8.51047e-58	2.94993e-56
SLC39A6	1.89218	3.05571	1.16353	2.99134e-43	2.90063e-42
GTF2I	3.09808	1.52876	-1.56932	1.48655e-36	8.95544e-36
ADPRHL2	2.92076	3.97811	1.05735	1.836e-45	2.07868e-44
BEX3	4.55315	5.55591	1.00276	1.57357e-16	3.33699e-16
KDELR3	2.10178	3.37709	1.27531	5.22796e-27	1.84098e-26
OR10J6P	2.43477	1.07429	-1.36048	1.88584e-33	9.52612e-33
THEM6	3.64271	4.72844	1.08572	6.01673e-42	5.30792e-41
JMJD1C	3.09275	1.99706	-1.09569	6.22464e-52	1.23555e-50
AL138478.1	1.718	0	-1.718	4.94106e-71	1.63928e-68
SLC28A1	4.43924	2.80556	-1.63368	5.01365e-25	1.58821e-24
TMEM138	3.30327	2.1028	-1.20048	3.16187e-30	1.32158e-29
RCAN1	4.81967	2.7806	-2.03907	2.29415e-62	1.43512e-60
CSAD	4.59555	2.75853	-1.83702	1.82934e-52	3.80598e-51
TBC1D16	1.27561	2.30168	1.02607	2.2692e-52	4.68439e-51
STK19	3.22423	1.86286	-1.36137	5.59824e-18	1.2681e-17
XAF1	3.53701	0.884773	-2.65224	9.00218e-48	1.22618e-46
TSEN15	2.25185	3.31255	1.06071	1.14428e-58	4.42909e-57
TAF1D	3.69159	2.41445	-1.27714	1.69073e-20	4.27318e-20
AC093484.3	3.73263	0	-3.73263	4.94087e-71	1.63928e-68
ACADVL	8.48749	6.53764	-1.94985	1.89418e-47	2.50476e-46
DEPDC7	3.92192	2.77859	-1.14333	3.479e-34	1.83366e-33
RPL17	6.61868	3.40516	-3.21352	1.30519e-21	3.47011e-21
PTH1R	3.88541	0.910093	-2.97532	3.56206e-69	7.43591e-67
AGTR1	4.22099	3.20342	-1.01757	1.1545e-25	3.77963e-25
RGS5	2.06351	3.76296	1.69945	4.34292e-46	5.18555e-45
AC005077.4	2.38058	0.963248	-1.41734	2.12765e-47	2.79757e-46
UGT1A1	5.62456	3.18614	-2.43842	2.90509e-42	2.61754e-41
NPIPA9	3.61947	0.0137574	-3.60571	3.69456e-34	1.94398e-33
BBOX1	2.92234	1.86087	-1.06147	7.01885e-13	1.27434e-12
THOC1	2.71896	1.62688	-1.09208	1.0419e-23	3.07553e-23
MST1P2	5.13372	3.09281	-2.04092	2.58068e-33	1.29236e-32
PSPH	1.58471	3.10302	1.5183	3.41543e-60	1.59036e-58
MRPL46	3.43389	2.09445	-1.33944	4.63554e-56	1.36272e-54
TMEM44-AS1	1.60708	2.66135	1.05427	6.42795e-37	3.98348e-36
NUP88	3.92594	2.84693	-1.07901	1.32913e-51	2.57229e-50
SLCO2B1	5.41219	4.06338	-1.34881	1.48522e-32	7.13576e-32
PRPF40B	1.63151	0.556119	-1.07539	1.74e-20	4.39591e-20
RIPOR3	2.44874	0.390216	-2.05853	3.35665e-69	7.08673e-67
SYNE2	3.13796	1.3212	-1.81676	2.13399e-51	4.04978e-50
ARHGAP10	1.74549	0.603511	-1.14198	2.06028e-56	6.25456e-55
APOE	10.4427	11.5937	1.15092	9.83231e-40	7.40472e-39
C15orf39	1.19818	2.20273	1.00456	7.14364e-50	1.17661e-48
JTB	5.88156	7.02565	1.14409	3.08669e-64	2.61861e-62
DEGS1	3.13012	4.13936	1.00924	7.60141e-42	6.63352e-41
FCN3	4.9289	1.49061	-3.43829	5.12513e-58	1.83115e-56
BCAM	3.89111	4.91834	1.02723	1.60965e-21	4.25824e-21
LGALS4	4.80283	5.91654	1.11372	1.06508e-12	1.91745e-12
RNASE4	5.30214	2.75814	-2.544	3.10396e-60	1.45627e-58
MIS18A	1.24174	2.43431	1.19256	6.18015e-59	2.45344e-57
CDKN2C	1.01366	2.52407	1.51041	1.66099e-61	9.26713e-60
LINC01128	2.16315	0.837395	-1.32575	5.28377e-56	1.54351e-54
RNU1-1	1.43714	0.00541432	-1.43173	1.01876e-60	5.18564e-59
UBE2V1	3.15927	1.08636	-2.0729	1.86467e-31	8.36611e-31
CHMP1B-AS1	1.20108	0	-1.20108	2.88097e-70	7.87141e-68
LARP1	3.37709	4.39544	1.01835	5.41057e-58	1.92573e-56
TMEM110-MUSTN1	1.62491	0.203831	-1.42108	4.94277e-30	2.04297e-29
GADD45B	6.64239	5.40337	-1.23902	4.65469e-23	1.32759e-22
CLRN3	3.3848	2.29393	-1.09087	4.48102e-10	7.21554e-10
HIST1H2BK	4.63345	6.22939	1.59595	1.40029e-37	9.07427e-37
MIR570	0.493092	2.05523	1.56214	1.1386e-46	1.41878e-45
PRIM1	1.08054	2.11694	1.0364	1.76861e-48	2.57113e-47
TMSB4XP8	1.17285	2.50236	1.32951	2.54115e-21	6.65334e-21
MLXIPL	6.84275	5.77809	-1.06466	2.8008e-16	5.88044e-16
MIR3685	0.390167	1.82678	1.43662	2.30532e-47	3.02048e-46
DCN	5.36299	1.92336	-3.43963	2.24589e-63	1.62993e-61
COL5A3	1.82615	2.8271	1.00094	1.15119e-15	2.35732e-15
PMVK	4.7033	6.22535	1.52205	3.77917e-61	2.01184e-59
ADCK2	2.29307	3.47977	1.1867	2.50304e-55	6.7495e-54
TRAM1	4.95701	6.11044	1.15343	7.41263e-42	6.47481e-41
AC027307.2	1.93382	3.21355	1.27973	1.40851e-54	3.56038e-53
SOX18	1.37567	2.51119	1.13552	1.73294e-41	1.47284e-40
SNORA33	0.956415	2.22945	1.27303	1.85237e-26	6.32632e-26
CLK3	3.10909	1.34978	-1.75931	9.36379e-32	4.28286e-31
LIFR	1.98114	0.844623	-1.13652	3.95734e-43	3.80753e-42
RALA	2.38831	3.41593	1.02763	1.84759e-55	5.07788e-54
RPL13AP25	0.994241	2.85069	1.85645	1.02314e-35	5.8851e-35
YWHAG	4.04041	5.35794	1.31753	6.91808e-50	1.1477e-48
HOMER2	3.09382	1.95497	-1.13886	1.0963e-37	7.15929e-37
B3GNT3	0.86229	2.09476	1.23247	2.42686e-14	4.686e-14
MUC3A	2.13564	1.02842	-1.10722	4.72638e-22	1.28417e-21
ADAMTS13	3.48337	1.06384	-2.41953	1.63208e-72	6.06449e-69
LIPG	3.55788	1.7941	-1.76378	4.64891e-50	7.84487e-49
GRHPR	6.61792	5.22387	-1.39405	8.26345e-46	9.58942e-45
GNAZ	0.271155	1.69263	1.42148	1.09558e-47	1.48251e-46
USP15	3.40271	1.36819	-2.03452	4.97863e-65	4.79264e-63
MAGI2-AS3	2.40175	0.678542	-1.72321	1.47015e-61	8.25196e-60
CCDC22	2.27476	3.29242	1.01766	3.85944e-55	1.01998e-53
PIGT	4.08467	5.91755	1.83288	1.23629e-68	2.2969e-66
NR4A1	3.91732	1.76223	-2.15509	1.46483e-40	1.15907e-39
PKD1	2.97167	1.56709	-1.40457	1.15976e-21	3.09098e-21
RAB17	5.20389	3.90113	-1.30276	4.56632e-42	4.05921e-41
EIF2S2	3.83142	4.88416	1.05275	1.50341e-47	2.00948e-46
SPRYD4	3.85705	2.52852	-1.32853	1.75464e-56	5.34418e-55
AF127577.1	1.8133	0	-1.8133	4.94106e-71	1.63928e-68
ITIH4	7.60349	2.87687	-4.72661	4.04366e-45	4.46389e-44
TRAPPC12	3.66771	2.3457	-1.32201	4.92639e-31	2.16172e-30
SON	4.47762	3.36127	-1.11635	1.18185e-42	1.09514e-41
RSRP1	3.87255	2.18104	-1.69151	4.07345e-19	9.68154e-19
LILRB3	1.56566	0.499254	-1.06641	5.28401e-50	8.87628e-49
CCPG1	3.11785	1.89611	-1.22173	1.96434e-58	7.35798e-57
MST1L	4.2958	1.50744	-2.78836	1.91229e-34	1.02387e-33
CCZ1	2.61587	0.744249	-1.87162	7.64249e-29	2.94768e-28
BLOC1S3	1.62285	2.78055	1.15769	2.39712e-67	3.56288e-65
EIF3CL	2.12423	0.0699259	-2.0543	1.44622e-32	6.95557e-32
MSH2	1.07475	2.24743	1.17268	1.32651e-67	2.10642e-65
UBL7	3.25991	4.31361	1.0537	2.24514e-58	8.34251e-57
AUTS2	2.71019	1.55363	-1.15656	2.35551e-39	1.72227e-38
COX20	2.71197	1.42949	-1.28247	3.24148e-31	1.43594e-30
RNU6-516P	0.328981	1.33893	1.00995	6.39314e-41	5.19362e-40
MFAP4	3.51436	2.13202	-1.38235	4.4138e-19	1.04784e-18
LINC02499	4.05959	2.07054	-1.98905	9.1103e-35	4.97532e-34
EPN1	4.87621	3.57598	-1.30023	7.01479e-41	5.68125e-40
EFHD2	3.43848	4.48526	1.04678	8.06261e-36	4.65347e-35
KRTCAP2	4.70994	3.18206	-1.52787	1.72079e-15	3.49448e-15
ALDH1A2	1.88073	0.644712	-1.23602	2.36732e-47	3.09735e-46
CYP7A1	1.83114	3.46629	1.63514	1.77629e-13	3.29851e-13
PDZK1IP1	1.45519	3.55491	2.09972	9.25783e-15	1.82166e-14
RPN1	5.45074	6.69026	1.23952	2.28347e-47	2.99398e-46
IGBP1	2.93372	4.33292	1.39921	1.11946e-54	2.85692e-53
AC099668.1	2.45971	0.49444	-1.96526	6.42672e-49	9.7471e-48
TLCD1	2.06023	3.25045	1.19023	6.40789e-45	7.00307e-44
SGSM2	2.81863	1.77666	-1.04197	2.23569e-23	6.47496e-23
MIA2	3.7893	1.11547	-2.67383	1.37664e-55	3.87525e-54
AL163636.2	3.13512	0.772726	-2.36239	5.00625e-64	4.11554e-62
DGAT2	5.24779	4.02966	-1.21814	2.31582e-22	6.37436e-22
C9	7.34341	4.34671	-2.9967	1.41959e-25	4.62711e-25
SIVA1	4.7685	3.59512	-1.17337	1.36456e-36	8.25536e-36
CROCC	2.31209	1.27744	-1.03465	2.75539e-17	6.04824e-17
CDK3	2.02621	0.417063	-1.60915	5.60671e-23	1.59399e-22
AC020978.5	2.07141	5.37596e-05	-2.07135	9.72648e-70	2.442e-67
SYNJ2BP-COX16	1.16224	0.161456	-1.00079	1.13665e-29	4.59683e-29
AP001324.1	1.95548	3.29999	1.34451	7.5051e-27	2.6151e-26
NIT2	4.94905	3.21043	-1.73862	1.08882e-61	6.2053e-60
CCNL2	5.22662	3.58502	-1.6416	4.30817e-22	1.17329e-21
NR1I3	5.40282	3.60132	-1.8015	1.0791e-29	4.37171e-29
SLC51B	0.713712	2.48208	1.76837	3.05774e-41	2.54753e-40
LTBP4	3.62353	2.19841	-1.42512	5.47005e-39	3.91028e-38
RNU1-27P	1.4595	0.0134133	-1.44608	5.01227e-57	1.6028e-55
MCM2	0.863739	2.76055	1.89681	1.89561e-61	1.04817e-59
COX7B2	0.0111293	1.51841	1.50728	3.0226e-26	1.01955e-25
MTSS1L	4.08914	3.02592	-1.06321	6.50349e-37	4.02493e-36
AC124068.1	3.68665	0	-3.68665	4.94081e-71	1.63928e-68
ABAT	5.71628	4.43755	-1.27873	1.43857e-26	4.9459e-26
INTS6	2.20787	0.964767	-1.24311	7.98711e-58	2.77369e-56
STIMATE	2.95161	1.37365	-1.57796	8.44917e-44	8.47151e-43
TXN	6.31888	7.98043	1.66156	2.66064e-57	8.84295e-56
SMN1	2.6244	1.31199	-1.31241	2.45963e-37	1.56982e-36
NQO1	1.12106	3.60986	2.4888	3.54176e-32	1.66084e-31
VKORC1	6.29548	4.75665	-1.53883	9.61636e-59	3.75341e-57
PSMC1	3.57442	1.53448	-2.03994	5.55869e-39	3.97059e-38
STXBP2	3.84587	2.57865	-1.26722	8.34057e-32	3.82805e-31
PLA2G7	0.823252	1.82391	1.00065	1.17044e-30	5.01861e-30
GTF2H4	2.6731	1.0727	-1.6004	2.18716e-22	6.02628e-22
CHKB	3.3236	1.14048	-2.18311	8.61638e-23	2.42478e-22
MYO18A	4.3605	3.17387	-1.18663	7.63175e-40	5.79222e-39
LINC00869	2.48957	1.03443	-1.45513	4.34014e-30	1.80111e-29
AC016026.1	2.08466	0.0438565	-2.04081	1.83942e-33	9.30175e-33
TBCC	2.28214	3.60031	1.31817	6.23009e-63	4.25547e-61
OGFOD2	2.00577	0.51726	-1.48851	1.61684e-29	6.47815e-29
C8orf33	2.682	4.04977	1.36777	1.44473e-67	2.22714e-65
SNHG14	1.80249	0.591283	-1.21121	1.52164e-36	9.16091e-36
NDUFS7	4.68945	3.38092	-1.30853	5.12487e-38	3.43364e-37
MTA1	3.53082	2.37215	-1.15867	4.97974e-26	1.65863e-25
JAGN1	3.78059	4.79731	1.01672	8.78006e-25	2.73745e-24
AL663070.1	1.855	0.463131	-1.39187	3.87761e-44	3.99125e-43
PBLD	5.17287	3.82519	-1.34768	1.39258e-30	5.93711e-30
UCHL3	3.16851	2.14907	-1.01944	1.34503e-43	1.33134e-42
DEPTOR	2.12692	3.42524	1.29833	2.1464e-39	1.57434e-38
CBWD6	1.84895	0.181733	-1.66722	4.13639e-41	3.42469e-40
FKBPL	1.39525	2.67553	1.28027	2.19172e-59	9.21265e-58
ADHFE1	4.52269	2.95477	-1.56792	1.02458e-40	8.20149e-40
TWF2	3.29185	4.6376	1.34575	3.67331e-42	3.28274e-41
MRAP2	0.115467	1.19102	1.07555	8.04353e-36	4.6439e-35
HLA-C	7.1391	8.56345	1.42435	1.13951e-37	7.43361e-37
DBNDD1	1.41384	2.66157	1.24773	6.08293e-33	2.98349e-32
EMC7	4.33242	5.47421	1.14179	2.82378e-49	4.42352e-48
HIST1H1C	5.19206	7.26445	2.07239	3.21209e-42	2.88436e-41
ACADL	2.66338	1.43674	-1.22664	4.80381e-31	2.10939e-30
MPPE1	2.87269	1.56908	-1.3036	2.0443e-36	1.22244e-35
CDC45	0.433248	1.55222	1.11897	1.44032e-52	3.02028e-51
WASF2	2.33112	3.52782	1.1967	5.58789e-54	1.34653e-52
EPHX1	8.01208	9.70715	1.69507	2.0329e-34	1.0872e-33
OST4	6.23651	7.39205	1.15554	8.13222e-63	5.43484e-61
COX8A	6.94457	8.19524	1.25067	1.60546e-59	6.85697e-58
C6orf47	2.13158	3.40219	1.27061	1.60795e-51	3.07981e-50
NDRG2	6.31473	4.43177	-1.88296	5.30702e-61	2.78528e-59
CDCA4	0.830991	1.83647	1.00548	1.91367e-64	1.67708e-62
ADM2	0.861562	2.0725	1.21093	2.15981e-33	1.08748e-32
MALAT1	3.97029	2.72151	-1.24878	4.71446e-20	1.16709e-19
LPGAT1	3.20589	4.37744	1.17156	1.2855e-38	8.94192e-38
PKN1	3.33042	4.54491	1.21449	2.44229e-49	3.83886e-48
RTP4	1.42028	2.63853	1.21825	6.50672e-34	3.38338e-33
MARCKS	2.46216	4.26728	1.80512	2.70413e-44	2.82883e-43
COMMD3-BMI1	1.32871	0.0037815	-1.32492	8.68773e-44	8.70601e-43
SUV39H1	1.47748	2.51895	1.04146	2.45531e-55	6.64974e-54
CSNK1A1	3.54113	2.46818	-1.07295	1.29223e-49	2.07864e-48
CPLX2	0.0613534	1.42908	1.36772	3.27835e-13	6.02816e-13
MRPS24	4.39787	2.43935	-1.95852	1.10563e-34	6.01687e-34
PPIAP22	4.14971	5.52448	1.37476	2.11712e-60	1.01902e-58
FUNDC2	3.89899	2.46479	-1.4342	2.45927e-33	1.23355e-32
C6orf89	2.93968	3.9727	1.03301	3.6807e-53	8.13123e-52
TSR3	4.16075	5.20734	1.04659	2.73355e-53	6.14106e-52
PNPLA7	2.19863	1.00296	-1.19567	6.70665e-52	1.32697e-50
BIRC5	0.568953	2.54302	1.97406	1.1782e-62	7.76235e-61
ALKBH6	1.98846	0.776898	-1.21156	1.40574e-16	2.98652e-16
IGKC	6.78443	4.54776	-2.23667	4.30456e-20	1.06751e-19
CMC4	1.41427	0.000164763	-1.41411	7.02324e-70	1.86407e-67
HPX	9.87489	8.57778	-1.29711	8.758e-23	2.46314e-22
APLN	0.298607	1.61312	1.31451	4.45222e-57	1.43607e-55
STAB1	4.37443	2.47606	-1.89837	7.92939e-55	2.04896e-53
TUBB	5.91848	7.3216	1.40312	2.30539e-48	3.30748e-47
IP6K1	2.19404	3.24893	1.05489	1.07863e-64	9.87185e-63
SNHG16	3.11306	1.97766	-1.1354	1.94028e-38	1.33266e-37
BPHL	4.36988	3.33529	-1.03459	1.13462e-26	3.91606e-26
MND1	0.243674	1.39311	1.14944	8.77959e-65	8.19679e-63
ACY1	5.23636	2.5997	-2.63666	1.89069e-53	4.34231e-52
PGP	1.99183	3.1116	1.11977	8.01807e-54	1.90253e-52
SOCS2	2.65413	1.54195	-1.11217	9.06972e-22	2.4326e-21
RPL32P29	1.34602	0	-1.34602	4.94106e-71	1.63928e-68
HAPLN4	1.2074	0.000443734	-1.20696	6.27469e-59	2.48566e-57
ADCY1	2.01594	0.813053	-1.20289	4.79313e-37	3.00039e-36
PSMA6	4.10561	2.06183	-2.04377	1.69175e-27	6.09484e-27
AP005329.3	1.4824	0	-1.4824	4.94081e-71	1.63928e-68
GFOD2	3.20009	2.08935	-1.11075	9.11972e-52	1.78729e-50
DEXI	3.97123	2.4709	-1.50033	1.54603e-46	1.91492e-45
FAM189B	1.9507	2.95695	1.00625	4.77072e-53	1.04154e-51
MRPL47	3.37105	4.46221	1.09116	8.45749e-50	1.3832e-48
MT1G	9.85405	4.35019	-5.50386	1.23593e-58	4.73452e-57
C1QC	4.11551	5.65716	1.54165	4.15725e-11	6.99046e-11
RPL21P16	5.92036	2.63839	-3.28197	4.68494e-48	6.5791e-47
SLC22A1	7.80638	4.51176	-3.29462	9.79653e-37	5.97145e-36
SLC39A1	4.36045	5.57827	1.21782	1.29354e-57	4.4016e-56
OIP5	0.328688	1.38663	1.05794	1.18444e-58	4.575e-57
AC026464.4	1.52109	0.00598878	-1.5151	2.70414e-41	2.26512e-40
C3orf85	1.99397	0.573514	-1.42046	5.09424e-47	6.49149e-46
FAM20A	5.10683	3.67943	-1.4274	1.2365e-33	6.31298e-33
CYB5A	7.57748	5.301	-2.27648	2.52694e-58	9.31509e-57
RPL41P2	2.51093	1.11431	-1.39662	4.79154e-36	2.80296e-35
CYSTM1	3.83945	5.13552	1.29607	1.29287e-52	2.72958e-51
C1orf43	5.63876	6.89445	1.25569	5.43608e-64	4.44921e-62
RNU6-8	0.3319	1.83115	1.49925	6.11539e-55	1.59576e-53
CYP2C8	7.84536	5.54613	-2.29923	1.13283e-29	4.58336e-29
SMIM19	4.18271	3.12397	-1.05874	1.67694e-39	1.24028e-38
ANXA10	4.22405	2.52667	-1.69739	1.00632e-29	4.08398e-29
ARIH1	2.65406	1.57804	-1.07602	1.32226e-43	1.3095e-42
PRR5	3.14499	1.87942	-1.26557	8.94352e-54	2.11401e-52
SPARCL1	2.35938	4.29199	1.93261	6.40699e-40	4.8825e-39
UROC1	4.55305	2.52567	-2.02738	1.48094e-24	4.57051e-24
MT-TL1	0.620527	1.99109	1.37057	1.7228e-32	8.23885e-32
CD74	6.80488	8.32281	1.51793	2.88868e-27	1.02893e-26
SP5	0.723893	1.87116	1.14727	3.26826e-26	1.09882e-25
OLFM2	3.33629	4.52599	1.1897	3.02816e-17	6.63368e-17
SERPIND1	6.63129	8.07443	1.44314	1.038e-23	3.06452e-23
TKFC	5.46807	3.85307	-1.615	2.01227e-32	9.58825e-32
IGHA1	6.12678	4.52764	-1.59914	2.49326e-13	4.60232e-13
NDUFB11	5.29992	6.33037	1.03046	2.79797e-44	2.92206e-43
INTS10	4.22659	2.52737	-1.69922	6.70697e-65	6.32532e-63
SLC52A2	2.23363	3.32975	1.09612	8.60875e-48	1.17432e-46
CREG1	5.42756	6.43943	1.01187	5.44657e-25	1.71978e-24
AC005523.2	1.39395	0	-1.39395	4.94087e-71	1.63928e-68
SEM1	4.81028	3.59494	-1.21534	1.59363e-22	4.41846e-22
DNAJC25-GNG10	1.06719	0.00960578	-1.05759	7.33997e-45	7.99352e-44
AC146944.4	1.27548	0.0268399	-1.24864	1.6672e-39	1.23406e-38
PDE2A	2.22917	1.0732	-1.15597	6.25326e-47	7.91413e-46
FERMT2	3.82183	2.82033	-1.0015	2.39688e-55	6.52957e-54
NKTR	2.6642	1.45611	-1.20809	3.0017e-26	1.01287e-25
INS-IGF2	1.74784	0.190843	-1.557	6.31705e-66	7.20027e-64
COL1A1	3.22805	4.56075	1.3327	4.9556e-15	9.86818e-15
STAG3	1.58928	0.578643	-1.01064	5.11237e-42	4.5273e-41
DCDC2	0.841517	2.05408	1.21256	8.98265e-17	1.92734e-16
REG3A	0.390302	2.10609	1.71579	9.62017e-05	0.000122714
DCAF8	4.92595	3.72678	-1.19917	3.06325e-28	1.14354e-27
NR1H3	4.89242	3.88795	-1.00448	1.21644e-35	6.95821e-35
ZC3H14	3.30098	1.29288	-2.0081	1.05087e-53	2.46517e-52
CENPM	0.442465	2.03043	1.58796	5.43428e-58	1.93047e-56
RETREG1	2.85491	1.52348	-1.33143	1.98531e-25	6.42039e-25
SLX1A	3.0312	0.0233597	-3.00784	1.08161e-25	3.54413e-25
IER3IP1	2.66886	3.74262	1.07376	5.98074e-53	1.2996e-51
LAMA5	3.68586	2.3451	-1.34076	2.54741e-20	6.38536e-20
AGAP9	2.3464	0.892332	-1.45407	7.81457e-32	3.59284e-31
HSD17B13	5.265	3.50549	-1.7595	1.86895e-11	3.18854e-11
PTRH1	1.57007	0.0225684	-1.5475	5.71771e-34	2.98146e-33
MIR3646	0.370486	1.60109	1.2306	4.4252e-41	3.65079e-40
SELENOP	8.03615	6.60344	-1.43271	3.00878e-30	1.25958e-29
TMSB10	7.19267	9.64918	2.45651	5.51471e-49	8.39818e-48
ASNA1	3.77111	5.04681	1.27569	2.98243e-63	2.13118e-61
RNF187	4.22505	5.71291	1.48786	9.81778e-65	9.07485e-63
ASF1B	0.482998	2.13322	1.65023	3.22285e-63	2.29415e-61
MT-ATP8	13.3636	10.9872	-2.37649	2.12131e-38	1.4511e-37
NDUFV2	5.60526	3.13306	-2.4722	6.13739e-52	1.21953e-50
ID1	5.08238	3.83556	-1.24682	1.2824e-21	3.41195e-21
ENOPH1	2.53075	3.696	1.16525	8.95526e-56	2.56759e-54
AC246787.1	0.803644	1.9279	1.12425	7.78839e-36	4.505e-35
LIX1L	2.06332	3.23581	1.17249	3.07844e-49	4.81029e-48
LMAN2	5.90453	7.28898	1.38445	6.48757e-66	7.30501e-64
PLIN2	6.91669	5.62871	-1.28799	1.33488e-29	5.37045e-29
CYP2B6	5.56076	3.79026	-1.7705	4.5954e-20	1.13852e-19
HBB	6.76255	3.03928	-3.72327	1.32929e-56	4.11615e-55
PGA3	1.4273	0.00101318	-1.42628	2.38072e-58	8.82862e-57
UNC13D	2.04378	0.966073	-1.07771	3.26545e-49	5.08114e-48
PLG	8.88364	6.99201	-1.89163	3.53961e-44	3.66569e-43
GSTZ1	4.85466	2.23069	-2.62397	3.30429e-64	2.79047e-62
MUC20	2.26083	1.16023	-1.10061	1.08107e-28	4.13445e-28
ARMC1	2.38489	3.54273	1.15783	1.31935e-57	4.48122e-56
RNF130	4.64017	3.30045	-1.33971	6.57386e-62	3.87732e-60
ELOVL2	2.38158	4.17458	1.793	1.22779e-29	4.9482e-29
TM4SF1	3.50396	4.60706	1.1031	3.25348e-16	6.81239e-16
AL157871.1	1.33955	0	-1.33955	1.66889e-69	3.56395e-67
EEF2	7.64479	8.74622	1.10143	3.6584e-45	4.0603e-44
AL732372.2	1.97933	0.0389711	-1.94036	1.47174e-40	1.16405e-39
HIST1H4J	1.72422	0.667105	-1.05712	1.94482e-27	6.9849e-27
PHLDB1	1.75973	0.700972	-1.05876	1.12226e-35	6.43532e-35
AL132712.1	0.608046	1.76097	1.15292	6.28755e-33	3.0784e-32
MARCO	3.51687	0.810985	-2.70588	5.42131e-49	8.26534e-48
AL354892.2	0.59616	1.62068	1.02452	2.98301e-38	2.02711e-37
METTL17	4.10902	2.90637	-1.20265	1.03441e-26	3.57682e-26
APOBEC3B	0.373657	1.38421	1.01056	1.68487e-35	9.56627e-35
IGKV1D-39	1.82369	0.127495	-1.69619	2.18405e-50	3.78168e-49
SRPX	2.49542	1.05811	-1.43732	1.36437e-44	1.45431e-43
SELENON	2.74278	3.84876	1.10598	2.96552e-48	4.21872e-47
MCM4	1.58152	2.89932	1.3178	8.61335e-50	1.40745e-48
HGH1	3.03349	4.10231	1.06882	7.66466e-48	1.05171e-46
FAM149A	3.13017	1.90358	-1.22659	1.64913e-44	1.74781e-43
RDH16	6.59317	4.43873	-2.15444	9.97405e-31	4.30849e-30
MIR635	0.522861	1.98918	1.46632	9.59661e-45	1.0342e-43
AC090498.1	7.3044	4.36885	-2.93555	1.42503e-41	1.2205e-40
HSPB1	6.76915	8.2782	1.50906	5.6668e-40	4.33801e-39
PLGLB1	4.35378	0.77968	-3.5741	1.06106e-60	5.38618e-59
MIR4664	0.33042	2.2681	1.93768	9.06022e-49	1.35641e-47
GCKR	5.76288	3.68479	-2.07809	2.89376e-57	9.53249e-56
SARNP	2.64215	0.623051	-2.0191	1.19302e-27	4.32493e-27
TAGLN	5.33511	3.77257	-1.56254	5.54256e-31	2.42751e-30
TGM2	6.25479	4.98066	-1.27413	3.91491e-24	1.18004e-23
HLA-DRB5	2.96227	5.12463	2.16237	1.39902e-24	4.3227e-24
FTH1P20	1.25558	2.51547	1.25989	1.34353e-36	8.13078e-36
SULT1A1	5.10106	3.07973	-2.02133	5.40934e-51	9.84331e-50
RHNO1	1.23018	2.48323	1.25305	4.93898e-66	5.84467e-64
AC009084.3	3.48518	0	-3.48518	5.49219e-68	9.27665e-66
CLPS	1.10647	0.095908	-1.01056	7.92301e-31	3.44331e-30
PRC1	0.857977	1.99471	1.13674	8.85567e-44	8.86951e-43
SLC29A2	1.34438	2.6912	1.34683	1.26926e-47	1.70634e-46
C1QTNF1	3.71779	2.12037	-1.59742	1.70074e-38	1.17291e-37
LMNA	4.70067	5.901	1.20032	1.42017e-57	4.81485e-56
TIMM10	4.35868	5.40328	1.0446	8.26936e-45	8.96885e-44
SUGP2	3.28772	2.16309	-1.12463	5.63525e-17	1.22139e-16
C4A-AS1	2.31479	0.00599413	-2.3088	4.61908e-46	5.50467e-45
CEBPG	3.31608	4.39992	1.08384	8.50687e-42	7.38893e-41
GBA3	4.09175	2.62228	-1.46947	2.6418e-19	6.3299e-19
NDUFS5	6.64903	7.73647	1.08745	3.29194e-46	3.9612e-45
GPC3	1.13787	6.46258	5.32471	2.62242e-59	1.09019e-57
PAN2	4.31073	2.59379	-1.71694	2.28782e-36	1.36192e-35
NES	1.37479	2.85724	1.48245	6.56832e-54	1.57056e-52
CCL20	1.73677	3.66316	1.92639	2.01256e-21	5.29249e-21
SNORD104	0.766484	4.50789	3.7414	3.27475e-68	5.90694e-66
EPS8L3	0.28361	1.98223	1.69862	9.00674e-38	5.9297e-37
SGK1	4.15863	2.56405	-1.59457	5.83743e-34	3.04218e-33
LBR	3.03638	4.06765	1.03126	3.77937e-44	3.89663e-43
RPN2	5.50873	7.21371	1.70498	8.57537e-67	1.17148e-64
WASH6P	2.81186	1.15439	-1.65747	9.14932e-21	2.33785e-20
PYGO2	2.58943	4.01088	1.42145	3.69587e-72	1.14443e-68
HMGA1	2.7442	4.96193	2.21773	4.95105e-58	1.77578e-56
AC011511.4	1.23729	0.00954247	-1.22775	8.78159e-37	5.38282e-36
AC242842.1	0.636794	1.6792	1.04241	6.51615e-30	2.67662e-29
CDKN2A	0.325588	1.93784	1.61225	4.3105e-56	1.27119e-54
PCM1	3.6714	2.47314	-1.19826	1.48321e-45	1.6937e-44
ZBED6CL	1.85299	2.8607	1.0077	2.01243e-37	1.29373e-36
SAE1	3.23143	4.44673	1.2153	1.40745e-65	1.47734e-63
MPDZ	3.33936	2.18571	-1.15365	2.17651e-31	9.72519e-31
AC025259.1	1.63465	0.0087317	-1.62592	1.33883e-67	2.10798e-65
PSD4	3.80677	2.52222	-1.28455	2.0803e-56	6.29478e-55
WDR27	2.15867	0.703784	-1.45488	3.75444e-22	1.02428e-21
NUTM2B-AS1	2.02425	0.529832	-1.49441	2.97263e-38	2.02083e-37
TNFRSF12A	3.60709	4.66017	1.05308	1.60443e-10	2.63561e-10
GTF3C6	3.92073	4.96414	1.04341	5.73956e-40	4.39035e-39
RTRAF	4.34899	3.34617	-1.00282	6.36817e-29	2.47118e-28
ST8SIA6-AS1	0.0645286	1.21764	1.15311	1.04269e-24	3.23678e-24
EEF1D	6.01381	3.87604	-2.13777	2.834e-24	8.61608e-24
ATP5F1E	4.45586	5.5722	1.11634	6.32789e-51	1.14475e-49
ACAA2	7.03617	5.54459	-1.49157	1.02114e-46	1.27499e-45
IL1RAP	3.67962	1.7278	-1.95182	4.12943e-59	1.66422e-57
MT1JP	2.04752	0.148932	-1.89859	1.59676e-66	2.08917e-64
AADAT	3.04968	1.54646	-1.50322	3.24032e-35	1.81167e-34
COX4I2	0.38052	1.85319	1.47267	1.7848e-64	1.57904e-62
NPIPB4	2.63662	0.137827	-2.49879	3.00168e-32	1.41364e-31
LAT	1.53597	0.104684	-1.43129	4.28707e-24	1.28966e-23
MIR99AHG	1.64379	0.631064	-1.01273	6.10185e-48	8.47915e-47
CXCL12	5.0322	2.53209	-2.5001	2.22809e-54	5.57144e-53
LINC01702	3.99037	2.81483	-1.17554	2.50889e-12	4.44099e-12
AC144530.1	0.51413	1.91564	1.40151	3.80165e-52	7.73613e-51
LUC7L	3.57934	2.03714	-1.5422	1.62217e-23	4.73426e-23
MT1F	6.29351	2.21624	-4.07727	1.45566e-57	4.90829e-56
AC138866.1	1.0696	0.0490241	-1.02058	2.12834e-33	1.07219e-32
HMGN4	2.46742	3.94404	1.47662	2.39244e-50	4.13099e-49
PEA15	3.45898	5.44852	1.98954	2.74907e-66	3.38244e-64
GOLM1	2.56531	4.06065	1.49533	3.77342e-27	1.3374e-26
C17orf58	2.01406	3.33477	1.3207	1.28478e-56	3.98495e-55
AL121899.1	0.349938	1.53609	1.18615	2.7094e-51	5.10527e-50
SNRPC	4.66999	6.09045	1.42046	9.88075e-70	2.44766e-67
EPO	2.26805	0.946379	-1.32167	3.81985e-29	1.50072e-28
ACAA1	6.74244	4.57706	-2.16539	7.93223e-63	5.32032e-61
[truncated: 253 more rows]
